# Supplementary material for: Doctors are to blame for perceived medical adverse events. A cross sectional population study. The Tromsø study
Source: PubMed Central journal article supplement (PMC3623705; doi:10.1186/1472-6963-13-46), 2013-02-05
Supplement: 1472-6963-13-46-S1.pdf [file 1472-6963-13-46-S1.pdf]

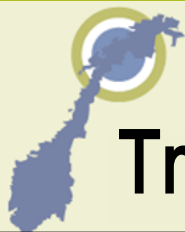

# The Tromsø Study

The form will be read electronically. Please use a blue or black pen  
You can not use comas, use upper-case letters.

2007 - 2008 Confidential

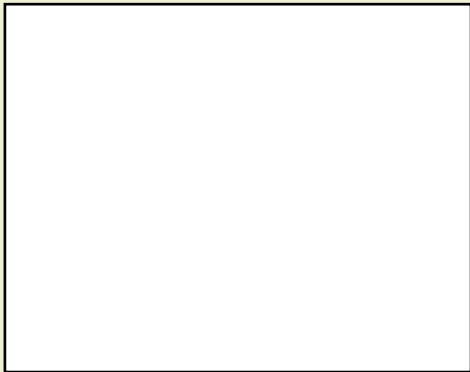

## HEALTH AND DISEASES

1 How do you in general consider your own health to be?

- Very good
- Good
- Neither good nor bad
- Bad
- Very bad

2 How is your health compared to others in your age?

- Much better
- A little better
- About the same
- A little worse
- Much worse

3 Do you have, or have you had?

Yes No

Age first time

- |                                                                    |                          |                          |                      |
|--------------------------------------------------------------------|--------------------------|--------------------------|----------------------|
| A heart attack .....                                               | <input type="checkbox"/> | <input type="checkbox"/> | <input type="text"/> |
| Angina pectoris ( <i>heart cramp</i> ) .....                       | <input type="checkbox"/> | <input type="checkbox"/> | <input type="text"/> |
| Cerebral stroke/brain hemorrhage..                                 | <input type="checkbox"/> | <input type="checkbox"/> | <input type="text"/> |
| Atrial fibrillation .....                                          | <input type="checkbox"/> | <input type="checkbox"/> | <input type="text"/> |
| High blood pressure .....                                          | <input type="checkbox"/> | <input type="checkbox"/> | <input type="text"/> |
| Osteoporosis .....                                                 | <input type="checkbox"/> | <input type="checkbox"/> | <input type="text"/> |
| Asthma .....                                                       | <input type="checkbox"/> | <input type="checkbox"/> | <input type="text"/> |
| Chronic bronchitis/Emphysema/COPD....                              | <input type="checkbox"/> | <input type="checkbox"/> | <input type="text"/> |
| Diabetes .....                                                     | <input type="checkbox"/> | <input type="checkbox"/> | <input type="text"/> |
| Psychological problems ( <i>for which you have sought help</i> )   | <input type="checkbox"/> | <input type="checkbox"/> | <input type="text"/> |
| Hypothyroidism .....                                               | <input type="checkbox"/> | <input type="checkbox"/> | <input type="text"/> |
| Kidney disease, <i>not including urinary tract infection (UTI)</i> | <input type="checkbox"/> | <input type="checkbox"/> | <input type="text"/> |
| Migraine .....                                                     | <input type="checkbox"/> | <input type="checkbox"/> | <input type="text"/> |

4 Do you have persistent or constantly recurring pain that has lasted for 3 months or more?

- Yes
- No

5 How often have you suffered from sleeplessness during the last 12 months?

- Never, or just a few times
- 1-3 times a month
- Approximately once a week
- More that once a week

6 Below you find a list of various problems.

Have you experienced any of this during the last week (including today)? (Tick once for each complaint)

|   |           |           |        |      |
|---|-----------|-----------|--------|------|
| + | No        | Little    | Pretty | Very |
|   | complaint | complaint | much   | much |

- |                                                         |                          |                          |                          |                          |
|---------------------------------------------------------|--------------------------|--------------------------|--------------------------|--------------------------|
| Sudden fear without reason                              | <input type="checkbox"/> | <input type="checkbox"/> | <input type="checkbox"/> | <input type="checkbox"/> |
| Felt afraid or anxious .....                            | <input type="checkbox"/> | <input type="checkbox"/> | <input type="checkbox"/> | <input type="checkbox"/> |
| Faintness or dizziness .....                            | <input type="checkbox"/> | <input type="checkbox"/> | <input type="checkbox"/> | <input type="checkbox"/> |
| Felt tense or upset .....                               | <input type="checkbox"/> | <input type="checkbox"/> | <input type="checkbox"/> | <input type="checkbox"/> |
| Tend to blame yourself .....                            | <input type="checkbox"/> | <input type="checkbox"/> | <input type="checkbox"/> | <input type="checkbox"/> |
| Sleeping problems .....                                 | <input type="checkbox"/> | <input type="checkbox"/> | <input type="checkbox"/> | <input type="checkbox"/> |
| Depressed, sad .....                                    | <input type="checkbox"/> | <input type="checkbox"/> | <input type="checkbox"/> | <input type="checkbox"/> |
| Feeling of being useless, worthless .....               | <input type="checkbox"/> | <input type="checkbox"/> | <input type="checkbox"/> | <input type="checkbox"/> |
| Feeling that everything is a struggle                   | <input type="checkbox"/> | <input type="checkbox"/> | <input type="checkbox"/> | <input type="checkbox"/> |
| Feeling of hopelessness with regard to the future ..... | <input type="checkbox"/> | <input type="checkbox"/> | <input type="checkbox"/> | <input type="checkbox"/> |

## USE OF HEALTH SERVICES

7 Have you during the last 12 months visited:

If YES; how many times?

Yes No No. of times

- |                                                                                                                                                                             |                          |                          |                      |
|-----------------------------------------------------------------------------------------------------------------------------------------------------------------------------|--------------------------|--------------------------|----------------------|
| General practitioner (GP) .....                                                                                                                                             | <input type="checkbox"/> | <input type="checkbox"/> | <input type="text"/> |
| Psychiatrist/psychologist .....                                                                                                                                             | <input type="checkbox"/> | <input type="checkbox"/> | <input type="text"/> |
| Medical specialist outside hospital<br>( <i>other than general practitioner/psychiatrist</i> )                                                                              | <input type="checkbox"/> | <input type="checkbox"/> | <input type="text"/> |
| Physiotherapist .....                                                                                                                                                       | <input type="checkbox"/> | <input type="checkbox"/> | <input type="text"/> |
| Chiropractor .....                                                                                                                                                          | <input type="checkbox"/> | <input type="checkbox"/> | <input type="text"/> |
| Alternative practitioner<br>( <i>homeopath, acupuncturist, foot zone therapist, herbal medicine practitioner, laying on hands practitioner, healer, clairvoyant, etc.</i> ) | <input type="checkbox"/> | <input type="checkbox"/> | <input type="text"/> |
| Dentist/dental service .....                                                                                                                                                | <input type="checkbox"/> | <input type="checkbox"/> | <input type="text"/> |

8 Have you during the last 12 months been to a hospital?

Yes No No. of times

- |                                                   |                          |                          |                      |
|---------------------------------------------------|--------------------------|--------------------------|----------------------|
| Admitted to a hospital .....                      | <input type="checkbox"/> | <input type="checkbox"/> | <input type="text"/> |
| Had consultation in a hospital without admission; |                          |                          |                      |
| At psychiatric out-patient clinic                 | <input type="checkbox"/> | <input type="checkbox"/> | <input type="text"/> |
| At another out-patient clinic .....               | <input type="checkbox"/> | <input type="checkbox"/> | <input type="text"/> |

9 Have you undergone any surgery during the last 3 years?

- Yes
- No

+

## USE OF MEDICINES

- 10 Do you currently use, or have you used some of the following medicines? (Tick once for each line)

|                               | Never used               | Now                      | Earlier                  | Age first time       |
|-------------------------------|--------------------------|--------------------------|--------------------------|----------------------|
| Blood pressure lowering drugs | <input type="checkbox"/> | <input type="checkbox"/> | <input type="checkbox"/> | <input type="text"/> |
| Cholesterol lowering drugs... | <input type="checkbox"/> | <input type="checkbox"/> | <input type="checkbox"/> | <input type="text"/> |
| Drugs for heart disease ..... | <input type="checkbox"/> | <input type="checkbox"/> | <input type="checkbox"/> | <input type="text"/> |
| Diuretics .....               | <input type="checkbox"/> | <input type="checkbox"/> | <input type="checkbox"/> | <input type="text"/> |
| Drugs for osteoporosis .....  | <input type="checkbox"/> | <input type="checkbox"/> | <input type="checkbox"/> | <input type="text"/> |
| Insulin .....                 | <input type="checkbox"/> | <input type="checkbox"/> | <input type="checkbox"/> | <input type="text"/> |
| Tablets for diabetes .....    | <input type="checkbox"/> | <input type="checkbox"/> | <input type="checkbox"/> | <input type="text"/> |
| The drugs for hypothyroidism  |                          |                          |                          |                      |
| Thyroxine/levaxin .....       | <input type="checkbox"/> | <input type="checkbox"/> | <input type="checkbox"/> | <input type="text"/> |

- 11 How often have you during the last 4 weeks used the following medicines? (Tick once for each line)

|                                    | Not used in the last 4 weeks | Less than every week     | Every week, but not daily | Daily                    |
|------------------------------------|------------------------------|--------------------------|---------------------------|--------------------------|
| Painkillers on prescription .....  | <input type="checkbox"/>     | <input type="checkbox"/> | <input type="checkbox"/>  | <input type="checkbox"/> |
| Painkillers non-prescription ..... | <input type="checkbox"/>     | <input type="checkbox"/> | <input type="checkbox"/>  | <input type="checkbox"/> |
| Sleeping pills .....               | <input type="checkbox"/>     | <input type="checkbox"/> | <input type="checkbox"/>  | <input type="checkbox"/> |
| Tranquillizers .....               | <input type="checkbox"/>     | <input type="checkbox"/> | <input type="checkbox"/>  | <input type="checkbox"/> |
| Antidepressants .....              | <input type="checkbox"/>     | <input type="checkbox"/> | <input type="checkbox"/>  | <input type="checkbox"/> |

- 12 State the name of all medicines -both those on prescription and non-prescription drugs- you have used regularly during the last 4 weeks. Do not include vitamins, minerals, herbs, natural remedies, other nutritional supplements, etc.

---



---



---



---



---



---

If there is not enough space for all medicines, continue on a separate sheet.

When attending you will be asked whether you have used antibiotics or painkillers the last 24 hours. If you have, you will be asked to provide the name of the drug, strength, dose and time of use.

## FAMILY AND FRIENDS

- 13 Who do you live with? (Tick for each question and give the number)

|                                    | Yes                      | No                       | Number               |
|------------------------------------|--------------------------|--------------------------|----------------------|
| Spouse/partner .....               | <input type="checkbox"/> | <input type="checkbox"/> | <input type="text"/> |
| Other people older than 18 years.. | <input type="checkbox"/> | <input type="checkbox"/> | <input type="text"/> |
| People younger than 18 years ..... | <input type="checkbox"/> | <input type="checkbox"/> | <input type="text"/> |

- 14 Tick for the relatives who have or have had

|                                              | Parents                  | Children                 | Siblings                 |
|----------------------------------------------|--------------------------|--------------------------|--------------------------|
| A heart attack .....                         | <input type="checkbox"/> | <input type="checkbox"/> | <input type="checkbox"/> |
| A heart attack before age of 60              | <input type="checkbox"/> | <input type="checkbox"/> | <input type="checkbox"/> |
| Angina pectoris ( <i>heart cramp</i> ) ..... | <input type="checkbox"/> | <input type="checkbox"/> | <input type="checkbox"/> |
| Cerebral stroke/brain haemorrhage            | <input type="checkbox"/> | <input type="checkbox"/> | <input type="checkbox"/> |
| Osteoporosis .....                           | <input type="checkbox"/> | <input type="checkbox"/> | <input type="checkbox"/> |
| Gastric/duodenal ulcers .....                | <input type="checkbox"/> | <input type="checkbox"/> | <input type="checkbox"/> |
| Asthma .....                                 | <input type="checkbox"/> | <input type="checkbox"/> | <input type="checkbox"/> |
| Diabetes .....                               | <input type="checkbox"/> | <input type="checkbox"/> | <input type="checkbox"/> |
| Dementia .....                               | <input type="checkbox"/> | <input type="checkbox"/> | <input type="checkbox"/> |
| Psychological problems .....                 | <input type="checkbox"/> | <input type="checkbox"/> | <input type="checkbox"/> |
| Substance abuse .....                        | <input type="checkbox"/> | <input type="checkbox"/> | <input type="checkbox"/> |

- 15 Do you have enough friends who can give you help when you need it?

Yes  No

- 16 Do you have enough friends whom you can talk confidentially with?

Yes  No

- 17 How often do you normally take part in organised gatherings, e.g. sport clubs, political meetings, religious or other associations?

- Never, or just a few times a year  
 1-2 times a month  
 Approximately once a week  
 More than once a week

## WORK, SOCIAL SECURITY AND INCOME

- 18 What is the highest level of education you have completed? (Tick once)

- Primary/secondary school, modern secondary school  
 Technical school, vocational school, 1-2 years senior high school  
 High school diploma  
 College/university less than 4 years  
 College/university 4 years or more

- 19 What is your main activity? (Tick once)

- Full time work  Housekeeping  
 Part time work  Retired/benefit recipient  
 Unemployed  Student/military service

20 Do you receive any of the following benefits?

- Old-age, early retirement or survivor pension
- Sickness benefit (on sick leave)
- Rehabilitation benefit
- Full disability pension
- Partial disability pension
- Unemployment benefits
- Transition benefit for single parents
- Social welfare benefits

21 What was the household's total taxable income last year? Include income from work, pensions, benefits and similar

- Less than 125 000 NOK
- 125 000-200 000 NOK
- 201 000-300 000 NOK
- 301 000-400 000 NOK
- 401 000-550 000 NOK
- 551 000-700 000 NOK
- 701 000 -850 000 NOK
- More than 850 000 NOK

22 Do you work outdoor at least 25% of the time, or in cold buildings (e.g. storehouse/industry buildings)?

- Yes
- No

## PHYSICAL ACTIVITY

23 If you have paid or unpaid work, which statement describes your work best?

- Mostly sedentary work  
*(e.g. office work, mounting)*
- Work that requires a lot of walking  
*(e.g. shop assistant, light industrial work, teaching)*
- Work that requires a lot of walking and lifting  
*(e.g. postman, nursing, construction)*
- Heavy manual labour

24 Describe your exercise and physical exertion in leisure time. If your activity varies much, e.g. between summer and winter, then give an average. The question refers only to the last year. (Tick the most appropriate box)

- Reading, watching TV, or other sedentary activity.
- Walking, cycling, or other forms of exercise at least 4 hours a week *(include walking or cycling to work, Sunday-walk/stroll, etc.)*
- Participation in recreational sports, heavy gardening, etc. *(note:duration of activity at least 4 hours a week)*
- Participation in hard training or sports competitions, regularly several times a week.

25 How often do you exercise?(With exercise we mean for example walking, skiing, swimming or training/sports)

- Never
- Less than once a week
- Once a week
- 2-3 times a week
- Approximately every day

26 How hard do you exercise on average?

- Easy- do not become short-winded or sweaty
- You become short-winded and sweaty
- Hard- you become exhausted

27 For how long time do you exercise every time on average?

- Less than 15 minutes
- 15-29 minutes
- 30-60 minutes
- More than 1 hour

## ALCOHOL AND TOBACCO

28 How often do you drink alcohol?

- Never
- Monthly or less frequently
- 2-4 times a month
- 2-3 times a week
- 4 or more times a week

29 How many units of alcohol (a beer, a glass of wine or a drink) do you usually drink when you drink alcohol?

- 1-2
- 3-4
- 5-6
- 7-9
- 10 or more

30 How often do you drink 6 units of alcohol or more in one occasion?

- Never
- Less frequently than monthly
- Monthly
- Weekly
- Daily or almost daily

31 Do you smoke sometimes, but not daily?

- Yes
- No

32 Do you/did you smoke daily?

- Yes, now
- Yes, previously
- Never

33 If you previously smoked daily, how long is it since you quit?

Number of years

34 If you currently smoke, or have smoked previously: How many cigarettes do you or did you usually smoke per day?

Number of cigarettes

35 How old were you when you began daily smoking?

Age in years

36 How many years in all have you smoked daily?

Number of years

37 Do you use or have you used snuff or chewing tobacco?

- No, never
- Yes, previously
- Yes, sometimes
- Yes, daily

## DIET

38 Do you usually eat breakfast every day?

Yes  No

39 How many units of fruit or vegetables do you eat on average per day? (units means for example a fruit, a cup of juice, potatoes, vegetables)

Number of units   +

40 How many times a week do you eat warm dinner?

Number

41 How often do you usually eat these foods?

(Tick once for each line)

|                                                                  | 0-1<br>times/<br>mth     | 2-3<br>times/<br>mth     | 1-3<br>times/<br>week    | 4-6<br>times/<br>week    | 1-2<br>times/<br>day     |
|------------------------------------------------------------------|--------------------------|--------------------------|--------------------------|--------------------------|--------------------------|
| Potatoes .....                                                   | <input type="checkbox"/> | <input type="checkbox"/> | <input type="checkbox"/> | <input type="checkbox"/> | <input type="checkbox"/> |
| Pasta/rice .....                                                 | <input type="checkbox"/> | <input type="checkbox"/> | <input type="checkbox"/> | <input type="checkbox"/> | <input type="checkbox"/> |
| Meat ( <i>not processed</i> ) .....                              | <input type="checkbox"/> | <input type="checkbox"/> | <input type="checkbox"/> | <input type="checkbox"/> | <input type="checkbox"/> |
| Processed meat<br>( <i>sausages, hamburger, etc.</i> ) ...       | <input type="checkbox"/> | <input type="checkbox"/> | <input type="checkbox"/> | <input type="checkbox"/> | <input type="checkbox"/> |
| Fruits, vegetables, berries                                      | <input type="checkbox"/> | <input type="checkbox"/> | <input type="checkbox"/> | <input type="checkbox"/> | <input type="checkbox"/> |
| Lean fish .....                                                  | <input type="checkbox"/> | <input type="checkbox"/> | <input type="checkbox"/> | <input type="checkbox"/> | <input type="checkbox"/> |
| Fatty fish .....                                                 | <input type="checkbox"/> | <input type="checkbox"/> | <input type="checkbox"/> | <input type="checkbox"/> | <input type="checkbox"/> |
| <i>(e.g. salmon, trout, mackerel, herring, halibut, redfish)</i> |                          |                          |                          |                          |                          |

42 How much do you usually drink the following?

(Tick once for each line)

|                                      | Rarely/<br>never         | 1-6<br>glasses<br>/week  | 1<br>glass<br>/day       | 2-3<br>glasses<br>/day   | 4 or more<br>glasses<br>/day |
|--------------------------------------|--------------------------|--------------------------|--------------------------|--------------------------|------------------------------|
| Milk, curdled milk,<br>yoghurt ..... | <input type="checkbox"/> | <input type="checkbox"/> | <input type="checkbox"/> | <input type="checkbox"/> | <input type="checkbox"/>     |
| Juice .....                          | <input type="checkbox"/> | <input type="checkbox"/> | <input type="checkbox"/> | <input type="checkbox"/> | <input type="checkbox"/>     |
| Soft drinks<br>with sugar .....      | <input type="checkbox"/> | <input type="checkbox"/> | <input type="checkbox"/> | <input type="checkbox"/> | <input type="checkbox"/>     |

43 How many cups of coffee and tea do you drink daily? (Put 0 for the types you do not drink daily)

|                                                             | Number of cups                            |
|-------------------------------------------------------------|-------------------------------------------|
| Filtered coffee .....                                       | <input type="text"/> <input type="text"/> |
| Boiled coffee ( <i>coarsely ground coffee for brewing</i> ) | <input type="text"/> <input type="text"/> |
| Other types of coffee .....                                 | <input type="text"/> <input type="text"/> |
| Tea .....                                                   | <input type="text"/> <input type="text"/> |

44 How often do you usually eat cod liver and roe? (i.e. "mølje")

Rarely/never  1-3 times/year  4-6 times/year  
 7-12 times/year  More than 12 times/year

45 Do you use the following nutritional supplements?

|                                                      | Daily                    | Sometimes                | No                       |
|------------------------------------------------------|--------------------------|--------------------------|--------------------------|
| + Cod liver oil or fish oil capsules .....           | <input type="checkbox"/> | <input type="checkbox"/> | <input type="checkbox"/> |
| Omega 3 capsules ( <i>fish oil, seal oil</i> ) ..... | <input type="checkbox"/> | <input type="checkbox"/> | <input type="checkbox"/> |
| Calcium tablets .....                                | <input type="checkbox"/> | <input type="checkbox"/> | <input type="checkbox"/> |

## QUESTIONS FOR WOMEN

46 Are you pregnant at the moment?

Yes  No  Uncertain

47 How many children have you given birth to?

Number   +

48 If you have given birth, fill in for each child: birth year, birth weight and months of breastfeeding (Fill in the best you can)

| Child | Birth year                                                                          | Birth weight in grams                                                               | Months of breastfeeding                   |
|-------|-------------------------------------------------------------------------------------|-------------------------------------------------------------------------------------|-------------------------------------------|
| 1     | <input type="text"/> <input type="text"/> <input type="text"/> <input type="text"/> | <input type="text"/> <input type="text"/> <input type="text"/> <input type="text"/> | <input type="text"/> <input type="text"/> |
| 2     | <input type="text"/> <input type="text"/> <input type="text"/> <input type="text"/> | <input type="text"/> <input type="text"/> <input type="text"/> <input type="text"/> | <input type="text"/> <input type="text"/> |
| 3     | <input type="text"/> <input type="text"/> <input type="text"/> <input type="text"/> | <input type="text"/> <input type="text"/> <input type="text"/> <input type="text"/> | <input type="text"/> <input type="text"/> |
| 4     | <input type="text"/> <input type="text"/> <input type="text"/> <input type="text"/> | <input type="text"/> <input type="text"/> <input type="text"/> <input type="text"/> | <input type="text"/> <input type="text"/> |
| 5     | <input type="text"/> <input type="text"/> <input type="text"/> <input type="text"/> | <input type="text"/> <input type="text"/> <input type="text"/> <input type="text"/> | <input type="text"/> <input type="text"/> |
| 6     | <input type="text"/> <input type="text"/> <input type="text"/> <input type="text"/> | <input type="text"/> <input type="text"/> <input type="text"/> <input type="text"/> | <input type="text"/> <input type="text"/> |

49 Have you during pregnancy had high blood pressure?

Yes  No

50 If yes, during which pregnancy?

The first  Second or later

51 Have you during pregnancy had proteinuria?

Yes  No

52 If yes, during which pregnancy?

The first  Second or later

53 Were any of your children delivered prematurely (a month or more before the due date) because of preeclampsia?

Yes  No

54 If yes, which child?

1st child 2nd child 3rd child 4th child 5th child 6th child

55 How old were you when you started menstruating?

Age   +

56 Do you currently use any prescribed drug influencing the menstruation?

Oral contraceptives, hormonal  
intrauterine or similar .....

Yes  No

Hormone treatment for  
menopausal problems .....

Yes  No

When attending you will get supplementary questions about menstruation and any use of hormones. Write down on a sheet of paper the names of all the hormones you have used and bring it with you. You will also be asked whether your menstruation have ceased and possibly when and why.
