# Supplementary material for: Doctors are to blame for perceived medical adverse events. A cross sectional population study. The Tromsø study
Source: PubMed Central journal article supplement (PMC3623705; doi:10.1186/1472-6963-13-46), 2013-02-05
Supplement: 1472-6963-13-46-S2.pdf [file 1472-6963-13-46-S2.pdf]

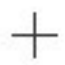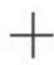

# Tromsø

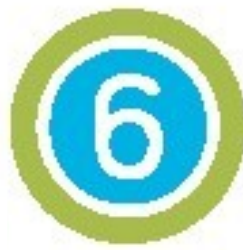

- part of The Tromsø Study

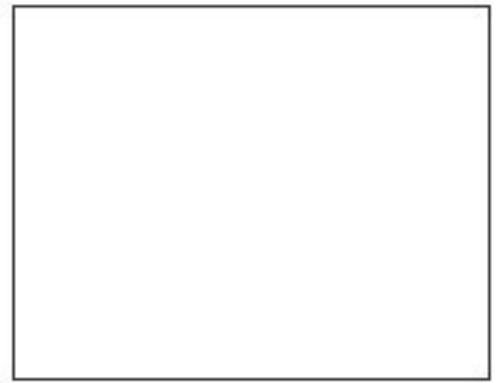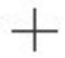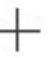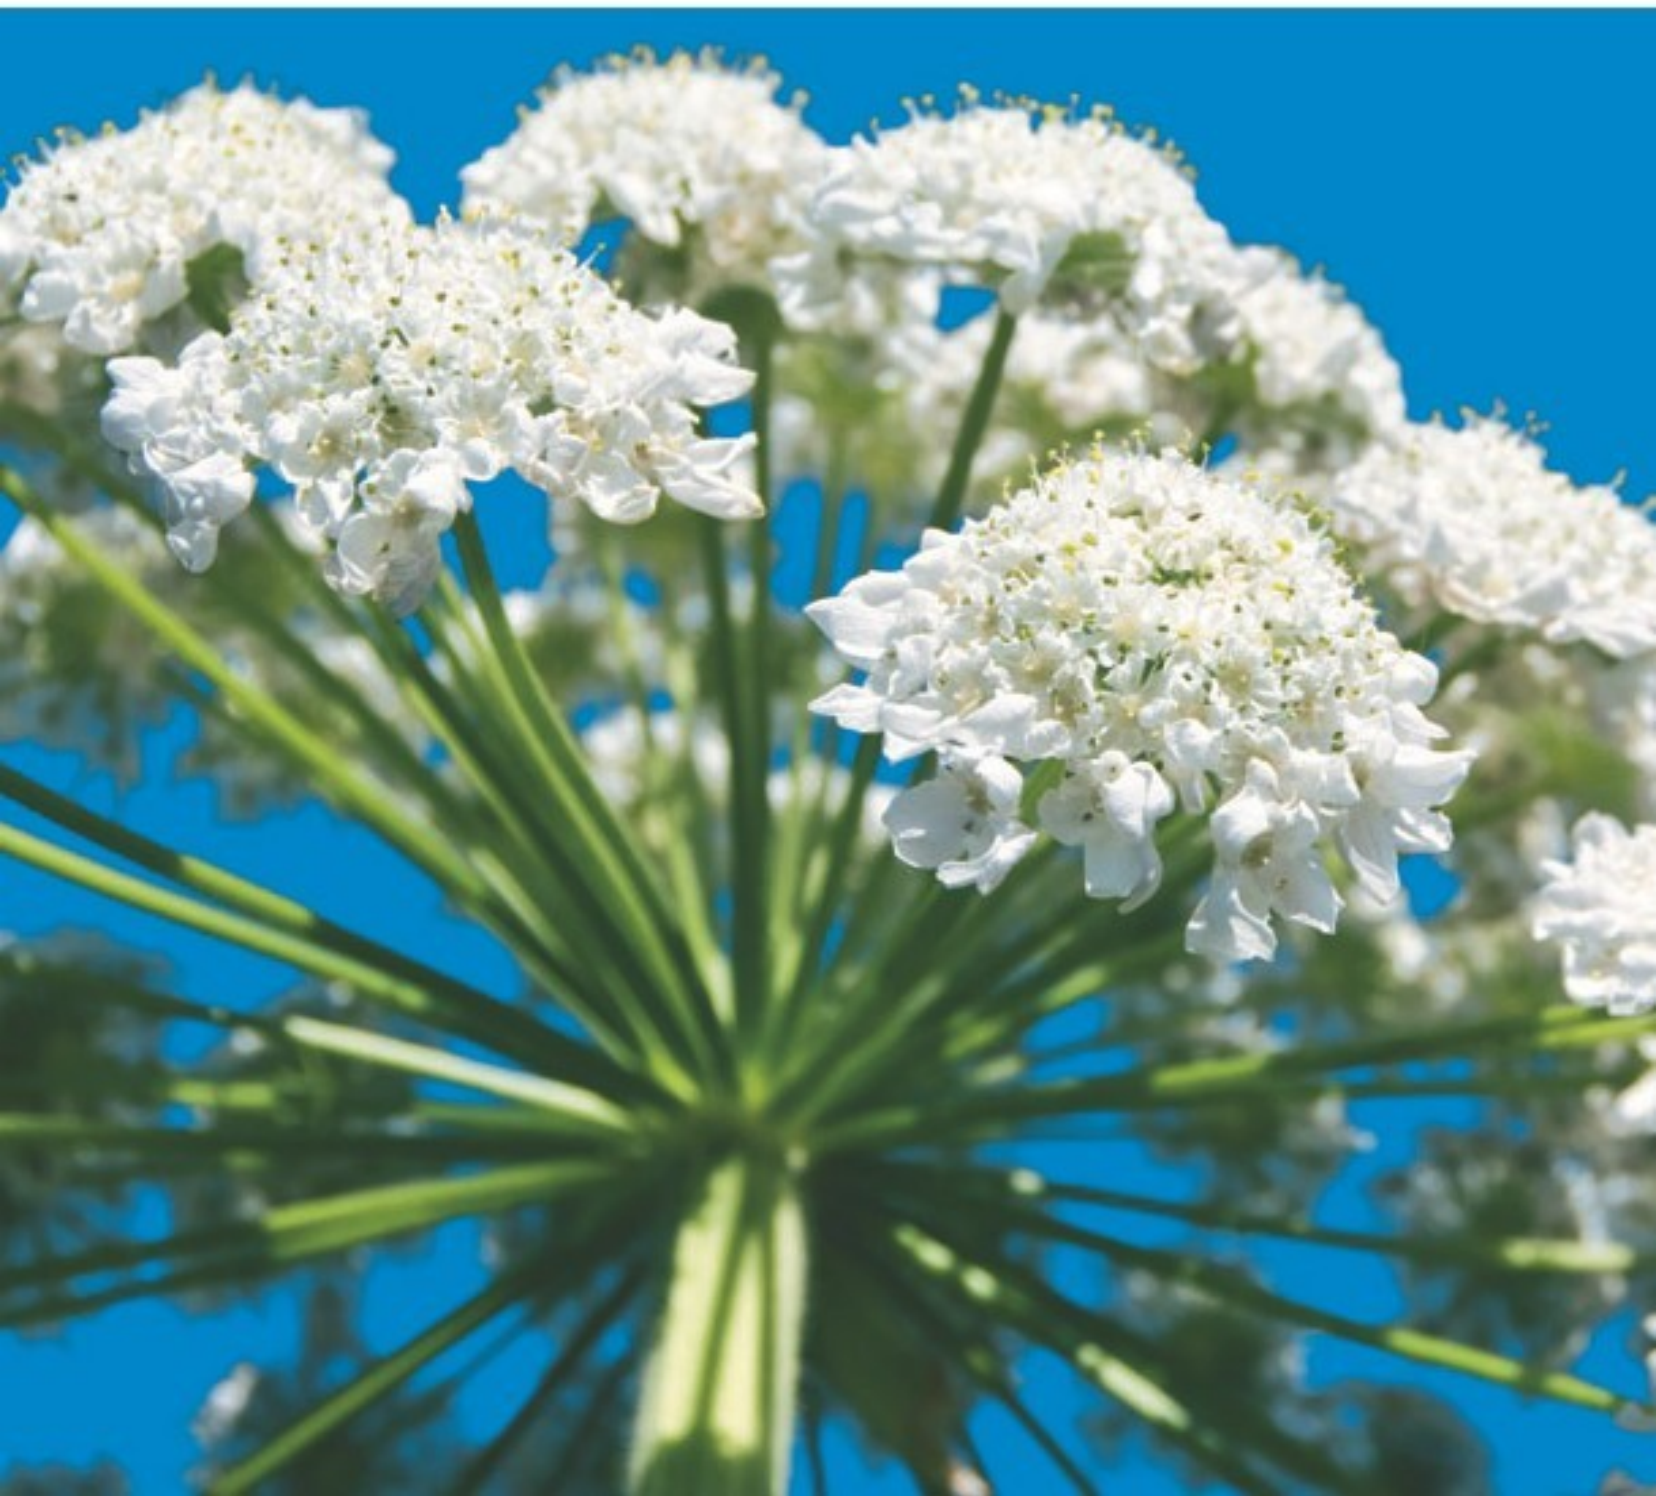

## FILL OUT THE FORM IN THIS WAY:

The form would be read by machine, it is therefore important that you tick appropriately:

Correct

Wrong

Wrong

If you tick the wrong box, correct by filling the box like this

Write the numbers clearly *1 2 3 4 5 6 7 8 9 0*

|   |   |
|---|---|
| 7 | 4 |
|---|---|

 Correct

|   |   |
|---|---|
| 7 | 4 |
|---|---|

 Wrong

Use only black or blue pen, do not use pencil or felt tip pen

# 1. DESCRIPTION OF YOUR HEALTH STATUS

By placing a tick in one box in each group below, please indicate which statements best describe your own health state today:

1.6 To allow you to show us how good or bad your state of health is we have made a scale (almost like a thermometer) where the best state of health you can imagine is marked 100 and the worst 0. We ask you to show your state of health by drawing a line from the box below to the point on the scale that best fits your state of health.

## 1.01 Mobility

- I have no problems in walking about
- I have some problems in walking about
- I am confined to bed

## 1.02 Self-care

- I have no problems with self-care
- I have some problems washing or dressing myself
- I am unable to wash or dress myself

## 1.03 Usual activities (e.g. work, study, housework, family or leisure activities)

- I have no problems with performing my usual activities
- I have some problems with performing my usual activities
- I am unable to perform my usual activities

## 1.04 Pain and discomfort

- I have no pain or discomfort
- I have moderate pain or discomfort
- I have extreme pain or discomfort

## 1.05 Anxiety and depression

- I am not anxious or depressed
- I am moderately anxious or depressed
- I am extremely anxious or depressed

Best imaginable health state

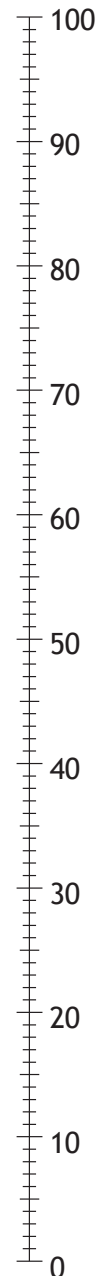

Your own health state today

Worst imaginable health state

## 2. CHILDHOOD/YOUTH AND AFFILIATION

2.01 **Where did you live at the age of 1 year?**

- In Tromsø (with present municipal borders)
- In Troms, but not Tromsø
- In Finnmark
- In Nordland
- Another place in Norway
- Abroad

2.02 **How was your family's financial situation during your childhood?**

- Very good
- Good
- Difficult
- Very difficult

2.03 **What is the importance of religion in your life?**

- Very important
- Somewhat important
- Not important

2.07 **What was/is the highest completed education for your parents and your spouse/partner?**  
(Tick once for each column)

|                                                                   | Mother                   | Father                   | Spouse/<br>partner       |
|-------------------------------------------------------------------|--------------------------|--------------------------|--------------------------|
| 7-10 years primary/secondary school, modern secondary school      | <input type="checkbox"/> | <input type="checkbox"/> | <input type="checkbox"/> |
| Technical school, vocational school, 1-2 years senior high school | <input type="checkbox"/> | <input type="checkbox"/> | <input type="checkbox"/> |
| High school diploma .....                                         | <input type="checkbox"/> | <input type="checkbox"/> | <input type="checkbox"/> |
| College or university (less than 4 years) .....                   | <input type="checkbox"/> | <input type="checkbox"/> | <input type="checkbox"/> |
| College or university (4 years or more) .....                     | <input type="checkbox"/> | <input type="checkbox"/> | <input type="checkbox"/> |

2.04 **What do you consider yourself as? (Tick for one or more alternatives)**

- Norwegian
- Sami
- Kven/Finnish
- Another

2.05 **How many siblings and children do you have/have you had?**

Number of siblings .....

Number of children .....

2.06 **Is your mother alive?**

- Yes       No

If NO: her age when she died .....

**Is your father alive?**

- Yes       No

If NO: his age when he died .....

### 3. WELL BEING AND LIVING CONDITIONS

**3.01** Below are three statements about satisfaction with life as a whole. Then there are two statements about views on your own health. Show how you agree or disagree with each of the statements by ticking in the box for the number you think fits best for you. (tick once for each statement)

|                                                   | Completely disagree      | 1                        | 2                        | 3                        | 4                        | 5                        | 6                        | 7                        | Completely agree |
|---------------------------------------------------|--------------------------|--------------------------|--------------------------|--------------------------|--------------------------|--------------------------|--------------------------|--------------------------|------------------|
| In most ways my life is close to my ideal .....   | <input type="checkbox"/> | <input type="checkbox"/> | <input type="checkbox"/> | <input type="checkbox"/> | <input type="checkbox"/> | <input type="checkbox"/> | <input type="checkbox"/> | <input type="checkbox"/> |                  |
| My life conditions are excellent .....            | <input type="checkbox"/> | <input type="checkbox"/> | <input type="checkbox"/> | <input type="checkbox"/> | <input type="checkbox"/> | <input type="checkbox"/> | <input type="checkbox"/> | <input type="checkbox"/> |                  |
| I am satisfied with my life .....                 | <input type="checkbox"/> | <input type="checkbox"/> | <input type="checkbox"/> | <input type="checkbox"/> | <input type="checkbox"/> | <input type="checkbox"/> | <input type="checkbox"/> | <input type="checkbox"/> |                  |
| I have a positive view of my future health .....  | <input type="checkbox"/> | <input type="checkbox"/> | <input type="checkbox"/> | <input type="checkbox"/> | <input type="checkbox"/> | <input type="checkbox"/> | <input type="checkbox"/> | <input type="checkbox"/> |                  |
| By living healthy, I can prevent serious diseases | <input type="checkbox"/> | <input type="checkbox"/> | <input type="checkbox"/> | <input type="checkbox"/> | <input type="checkbox"/> | <input type="checkbox"/> | <input type="checkbox"/> | <input type="checkbox"/> |                  |

**3.02** Below are four statements concerning your current job conditions, or if you are not working now, the last job you had. (Tick once for each statement)

|                                                                          | Completely disagree      | 1                        | 2                        | 3                        | 4                        | 5                        | 6                        | 7                        | Completely agree |
|--------------------------------------------------------------------------|--------------------------|--------------------------|--------------------------|--------------------------|--------------------------|--------------------------|--------------------------|--------------------------|------------------|
| My work is tiring, physically or mentally .....                          | <input type="checkbox"/> | <input type="checkbox"/> | <input type="checkbox"/> | <input type="checkbox"/> | <input type="checkbox"/> | <input type="checkbox"/> | <input type="checkbox"/> | <input type="checkbox"/> |                  |
| I have sufficient influence on when and how my work should be done ..... | <input type="checkbox"/> | <input type="checkbox"/> | <input type="checkbox"/> | <input type="checkbox"/> | <input type="checkbox"/> | <input type="checkbox"/> | <input type="checkbox"/> | <input type="checkbox"/> |                  |
| I am being bullied or harassed at work .....                             | <input type="checkbox"/> | <input type="checkbox"/> | <input type="checkbox"/> | <input type="checkbox"/> | <input type="checkbox"/> | <input type="checkbox"/> | <input type="checkbox"/> | <input type="checkbox"/> |                  |
| I am being treated fairly at work .....                                  | <input type="checkbox"/> | <input type="checkbox"/> | <input type="checkbox"/> | <input type="checkbox"/> | <input type="checkbox"/> | <input type="checkbox"/> | <input type="checkbox"/> | <input type="checkbox"/> |                  |

**3.03** I consider my occupation to have the following social status in the society (if you are not currently employed, think about your latest occupation)

- Very high status
- Fairly high status
- Medium status
- Fairly low status
- Very low status

**3.04** Have you over a long period experienced any of the following? (Tick one or more for each line)

|                                                                                                          | No                       | Yes,<br>as a child       | Yes,<br>as adult         | Yes,<br>last year        |
|----------------------------------------------------------------------------------------------------------|--------------------------|--------------------------|--------------------------|--------------------------|
| Been tormented, or threatened with violence .....                                                        | <input type="checkbox"/> | <input type="checkbox"/> | <input type="checkbox"/> | <input type="checkbox"/> |
| Been beaten, kicked at or victim of other types of violence                                              | <input type="checkbox"/> | <input type="checkbox"/> | <input type="checkbox"/> | <input type="checkbox"/> |
| Someone in your close family have used alcohol or drugs in such a way that it has caused you worry ..... | <input type="checkbox"/> | <input type="checkbox"/> | <input type="checkbox"/> | <input type="checkbox"/> |

If you have experienced anything of the above, how much are you affected by that now?

- Not affected       Affected to some extent       Affected to a large extent

## 4. ILLNESS AND WORRIES

4.01 **Have you during the last month experienced any illness or injury?**

Yes       No

If YES: have you during the same period?  
(Tick once for each line)

|                                                                                   | Yes                      | No                       |
|-----------------------------------------------------------------------------------|--------------------------|--------------------------|
| Been to a general practitioner .....                                              | <input type="checkbox"/> | <input type="checkbox"/> |
| Been to a medical specialist .....                                                | <input type="checkbox"/> | <input type="checkbox"/> |
| Been to emergency department .....                                                | <input type="checkbox"/> | <input type="checkbox"/> |
| Been admitted to a hospital .....                                                 | <input type="checkbox"/> | <input type="checkbox"/> |
| Been to an alternative practitioner<br>(chiropractor, homeopath or similar) ..... | <input type="checkbox"/> | <input type="checkbox"/> |

4.02 **Have you noticed sudden changes in your pulse or heart rhythm in the last year?**

Yes       No

4.03 **Do you become breathless in the following situations? (tick once for each question)**

|                                                                    | Yes                      | No                       |
|--------------------------------------------------------------------|--------------------------|--------------------------|
| When you walk rapidly on level ground or up a moderate slope ..... | <input type="checkbox"/> | <input type="checkbox"/> |
| When you walk calmly on level ground .....                         | <input type="checkbox"/> | <input type="checkbox"/> |
| While you are washing or dressing .....                            | <input type="checkbox"/> | <input type="checkbox"/> |
| At rest .....                                                      | <input type="checkbox"/> | <input type="checkbox"/> |

4.04 **Do you cough about daily for some periods of the year?**

Yes       No

If YES: Is the cough usually productive?

Yes       No

Have you had this kind of cough for as long as 3 months in each of the last two years?

Yes       No

4.05 **How often do you suffer from sleeplessness? (tick once)**

Never, or just a few times a year  
 1-3 times a month  
 Approximately once a week  
 More than once a week

If you suffer from sleeplessness monthly or more often, what time of the year does it affect you most? (Put one or more ticks)

No particular time  
 Polar night time  
 Midnight sun time  
 Spring and autumn

4.06 **Have you had difficulty sleeping during the past couple of weeks?**

Not at all  
 No more than usual  
 Rather more than usual  
 Much more than usual

4.07 **Have you during the last two weeks felt unhappy and depressed?**

Not at all  
 No more than usual  
 Rather more than usual  
 Much more than usual

4.08 **Have you during the last two weeks felt unable to cope with your difficulties?**

Not at all  
 No more than usual  
 Rather more than usual  
 Much more than usual

4.09 **Below, please answer a few questions about your memory: (tick once for each question)**

|                                                                        | Yes                      | No                       |
|------------------------------------------------------------------------|--------------------------|--------------------------|
| Do you think that your memory has declined? .....                      | <input type="checkbox"/> | <input type="checkbox"/> |
| Do you often forget where you have placed your things? .....           | <input type="checkbox"/> | <input type="checkbox"/> |
| Do you have difficulties finding common words in a conversation? ..... | <input type="checkbox"/> | <input type="checkbox"/> |
| Have you problems performing daily tasks you used to master? .....     | <input type="checkbox"/> | <input type="checkbox"/> |
| Have you been examined for memory problems? .....                      | <input type="checkbox"/> | <input type="checkbox"/> |

If YES to at least one of the first four questions above: Is this a problem in your daily life?

Yes       No

4.10 Have you during the last last year suffered from pain and/or stiffness in muscles or joints in your neck/shoulders lasting for at least 3 consecutive months?

(tick once for each line)

|                           | No complaint             | Little complaint         | Severe complaint         |
|---------------------------|--------------------------|--------------------------|--------------------------|
| Neck, shoulders .....     | <input type="checkbox"/> | <input type="checkbox"/> | <input type="checkbox"/> |
| Arms, hands.....          | <input type="checkbox"/> | <input type="checkbox"/> | <input type="checkbox"/> |
| Upper part of the back... | <input type="checkbox"/> | <input type="checkbox"/> | <input type="checkbox"/> |
| The lumbar region.....    | <input type="checkbox"/> | <input type="checkbox"/> | <input type="checkbox"/> |
| Hips, leg, feet.....      | <input type="checkbox"/> | <input type="checkbox"/> | <input type="checkbox"/> |
| Other places.....         | <input type="checkbox"/> | <input type="checkbox"/> | <input type="checkbox"/> |

4.11 Have you suffered from pain and/or stiffness in muscles or joints during the last 4 weeks? (tick once for each line)

|                            | No complaint             | Little complaint         | Severe complaint         |
|----------------------------|--------------------------|--------------------------|--------------------------|
| Neck, shoulders .....      | <input type="checkbox"/> | <input type="checkbox"/> | <input type="checkbox"/> |
| Arms, hands .....          | <input type="checkbox"/> | <input type="checkbox"/> | <input type="checkbox"/> |
| Upper part of the back ... | <input type="checkbox"/> | <input type="checkbox"/> | <input type="checkbox"/> |
| The lumbar region .....    | <input type="checkbox"/> | <input type="checkbox"/> | <input type="checkbox"/> |
| Hips, leg, feet.....       | <input type="checkbox"/> | <input type="checkbox"/> | <input type="checkbox"/> |
| Other places .....         | <input type="checkbox"/> | <input type="checkbox"/> | <input type="checkbox"/> |

4.12 Have you ever had:

|                                      | Yes                      | No                       | Age last time        |
|--------------------------------------|--------------------------|--------------------------|----------------------|
| Fracture in the wrist/forearm? ..... | <input type="checkbox"/> | <input type="checkbox"/> | <input type="text"/> |
| Hip fracture? .....                  | <input type="checkbox"/> | <input type="checkbox"/> | <input type="text"/> |

4.13 Have you been diagnosed with arthrosis by a physician?

Yes  No

4.14 Do you have or have you ever had some of the following:

|                       | Never                    | Some                     | Much                     |
|-----------------------|--------------------------|--------------------------|--------------------------|
| Nickel allergy .....  | <input type="checkbox"/> | <input type="checkbox"/> | <input type="checkbox"/> |
| Pollen allergy .....  | <input type="checkbox"/> | <input type="checkbox"/> | <input type="checkbox"/> |
| Other allergies ..... | <input type="checkbox"/> | <input type="checkbox"/> | <input type="checkbox"/> |

4.15 Have you ever experienced infertility for more than 1 year?

Yes  No

If Yes: was it due to:

|                                           | Yes                      | No                       | Do not know              |
|-------------------------------------------|--------------------------|--------------------------|--------------------------|
| A condition concerning you?.....          | <input type="checkbox"/> | <input type="checkbox"/> | <input type="checkbox"/> |
| A condition concerning your partner?..... | <input type="checkbox"/> | <input type="checkbox"/> | <input type="checkbox"/> |

4.16 To which degree have you had the following complaints during the last 12 months?

|                                             | Never                    | Some                     | Much                     |
|---------------------------------------------|--------------------------|--------------------------|--------------------------|
| Nausea .....                                | <input type="checkbox"/> | <input type="checkbox"/> | <input type="checkbox"/> |
| Heartburn/regurgitation....                 | <input type="checkbox"/> | <input type="checkbox"/> | <input type="checkbox"/> |
| Diarrhoea.....                              | <input type="checkbox"/> | <input type="checkbox"/> | <input type="checkbox"/> |
| Constipation.....                           | <input type="checkbox"/> | <input type="checkbox"/> | <input type="checkbox"/> |
| Alternating diarrhoea and constipation..... | <input type="checkbox"/> | <input type="checkbox"/> | <input type="checkbox"/> |
| Bloated stomach.....                        | <input type="checkbox"/> | <input type="checkbox"/> | <input type="checkbox"/> |
| Abdominal pain.....                         | <input type="checkbox"/> | <input type="checkbox"/> | <input type="checkbox"/> |

4.17 If you have had abdominal pain or discomfort during the last year:

|                                                                                        | Yes                      | No                       |
|----------------------------------------------------------------------------------------|--------------------------|--------------------------|
| Was it located in your upper stomach?.....                                             | <input type="checkbox"/> | <input type="checkbox"/> |
| Were you bothered as often as once a week or more during the last 3 months?.....       | <input type="checkbox"/> | <input type="checkbox"/> |
| Do you feel symptoms relief after bowel movement?.....                                 | <input type="checkbox"/> | <input type="checkbox"/> |
| Are the symptoms related to more frequent or rare bowel movements than normally? ..... | <input type="checkbox"/> | <input type="checkbox"/> |
| Are the symptoms related to more loose or hard stool than normally?.....               | <input type="checkbox"/> | <input type="checkbox"/> |
| Do the symptoms appear after a meal? ...                                               | <input type="checkbox"/> | <input type="checkbox"/> |

4.18 Have you ever had:

|                      | Yes                      | No                       | Age last time        |
|----------------------|--------------------------|--------------------------|----------------------|
| Gastric ulcer .....  | <input type="checkbox"/> | <input type="checkbox"/> | <input type="text"/> |
| Duodenal ulcer ..... | <input type="checkbox"/> | <input type="checkbox"/> | <input type="text"/> |
| Ulcer surgery .....  | <input type="checkbox"/> | <input type="checkbox"/> | <input type="text"/> |

4.19 For women: Have you ever had a miscarriage?

Yes  No  Do not know  
If Yes: number of times .....

4.20 For men: Have your partner ever had a miscarriage?

Yes  No  Do not know  
If Yes: number of times .....

4.21 Is your diet gluten-free?

Yes  No  Do not know

4.22 Have you been diagnosed with Dermatitis Herpetiformis (DH)?

Yes  No  Do not know

4.23 Have you been diagnosed with coeliac disease, based on a biopsy from your intestine taken in a gastroscopy examination?  
 Yes     No     Do not know

4.24 Do you have your natural teeth?  
 Yes     No

4.25 How many amalgam tooth fillings do you have/have you had?  
 0     1-5     6-10     10+

4.26 Have you been suffering from headache the last year?  
 Yes     No  
**If No: go to section 5, food habits**

4.27 What kind of headache are you suffering from?  
 Migraine     Other headache

4.28 How many days per month do you suffer from headache?  
 Less than one day  
 1-6 days  
 7-14 days  
 More than 14 days

4.29 Is the headache attacks usually:  
 (tick once for each line)

|                                                | Yes                      | No                       |
|------------------------------------------------|--------------------------|--------------------------|
| Pounding/pulsatory pain .....                  | <input type="checkbox"/> | <input type="checkbox"/> |
| Pressing/tightening pain .....                 | <input type="checkbox"/> | <input type="checkbox"/> |
| Unilateral pain ( <i>right or left</i> ) ..... | <input type="checkbox"/> | <input type="checkbox"/> |

4.30 What is the normal intensity of your headache attacks?  
 Mild (*do not hinder normal activity*)  
 Moderate (*decrease normal activity*)  
 Strong (*block normal activity*)

4.31 What is the normal duration of the headache attacks?  
 Less than 4 hours  
 4 hours - 1 day  
 1-3 days  
 More than 3 days

4.32 If you suffer from headache, when during the year does it affect you most? (tick one or more)  
 No particular time  
 Polar night time  
 Midnight sun time  
 Spring and/or Autumn

4.33 Before or during the headache, do you have a temporary:

|                                                                                   | Yes                      | No                       |
|-----------------------------------------------------------------------------------|--------------------------|--------------------------|
| Visual disturbances? ( <i>flickering, blurred vision, flashes of light</i> )..... | <input type="checkbox"/> | <input type="checkbox"/> |
| Unilateral numbness in your face or hand? .....                                   | <input type="checkbox"/> | <input type="checkbox"/> |
| Aggravated pain by moderate physical activity? .....                              | <input type="checkbox"/> | <input type="checkbox"/> |
| Nausea and/or vomiting? .....                                                     | <input type="checkbox"/> | <input type="checkbox"/> |

4.34 Describe how many days you have been away from work or school during the last month due to headache?  
 Number of days.....



## 5. FOOD HABITS

5.01 How often do you usually eat the following? (tick once for each line)

|                                                         | 0-1 times<br>per month   | 2-3 times<br>per month   | 1-3 times<br>per week    | More than 3<br>times per week |
|---------------------------------------------------------|--------------------------|--------------------------|--------------------------|-------------------------------|
| Fresh water fish ( <i>not farmed</i> ) .....            | <input type="checkbox"/> | <input type="checkbox"/> | <input type="checkbox"/> | <input type="checkbox"/>      |
| Salt water fish ( <i>not farmed</i> ) .....             | <input type="checkbox"/> | <input type="checkbox"/> | <input type="checkbox"/> | <input type="checkbox"/>      |
| Farmed fish ( <i>salmon, trout, char</i> ) .....        | <input type="checkbox"/> | <input type="checkbox"/> | <input type="checkbox"/> | <input type="checkbox"/>      |
| Tuna fish ( <i>fresh or canned</i> ) .....              | <input type="checkbox"/> | <input type="checkbox"/> | <input type="checkbox"/> | <input type="checkbox"/>      |
| Fish bread spread .....                                 | <input type="checkbox"/> | <input type="checkbox"/> | <input type="checkbox"/> | <input type="checkbox"/>      |
| Mussels, shells .....                                   | <input type="checkbox"/> | <input type="checkbox"/> | <input type="checkbox"/> | <input type="checkbox"/>      |
| The brown content in crabs .....                        | <input type="checkbox"/> | <input type="checkbox"/> | <input type="checkbox"/> | <input type="checkbox"/>      |
| Whale or seal meat .....                                | <input type="checkbox"/> | <input type="checkbox"/> | <input type="checkbox"/> | <input type="checkbox"/>      |
| Pluck (liver/kidney/heart) from reindeer or elk/moose.. | <input type="checkbox"/> | <input type="checkbox"/> | <input type="checkbox"/> | <input type="checkbox"/>      |
| Pluck (liver/kidney/heart) from ptarmigan/grouse .....  | <input type="checkbox"/> | <input type="checkbox"/> | <input type="checkbox"/> | <input type="checkbox"/>      |

5.02 How many times during the year do/did you usually eat the following? (number of times)

|                                                                                                                                | In adulthood                                            | In childhood                                            |
|--------------------------------------------------------------------------------------------------------------------------------|---------------------------------------------------------|---------------------------------------------------------|
| Mølje (cod or pollack meat, liver, and roe)( <i>Number of times per year</i> )                                                 | <input style="width: 40px; height: 20px;" type="text"/> | <input style="width: 40px; height: 20px;" type="text"/> |
| Sea gull's egg ( <i>Number of eggs per year</i> ) .....                                                                        | <input style="width: 40px; height: 20px;" type="text"/> | <input style="width: 40px; height: 20px;" type="text"/> |
| Reindeer meat ( <i>Number of times per year</i> ) .....                                                                        | <input style="width: 40px; height: 20px;" type="text"/> | <input style="width: 40px; height: 20px;" type="text"/> |
| Local mushroom and wild berries ( <i>blueberries/lingonberries/cloudberries</i> )<br>( <i>Number of times per year</i> ) ..... | <input style="width: 60px; height: 20px;" type="text"/> | <input style="width: 60px; height: 20px;" type="text"/> |

5.03 How many times per month do you eat canned (tinned) foods (from metal boxes)?

Number .....

5.04 Do you take vitamins and/or mineral supplements?

Yes, daily     Sometimes     Never

5.05 How often do you eat?

|                                    | Never                    | 1-3 times<br>per month   | 1-3 times<br>per week    | 4-6 times<br>per week    | 1-2 times<br>per day     | 3 times per day<br>or more |
|------------------------------------|--------------------------|--------------------------|--------------------------|--------------------------|--------------------------|----------------------------|
| Dark chocolate .....               | <input type="checkbox"/> | <input type="checkbox"/> | <input type="checkbox"/> | <input type="checkbox"/> | <input type="checkbox"/> | <input type="checkbox"/>   |
| Light chocolate/milk chocolate ... | <input type="checkbox"/> | <input type="checkbox"/> | <input type="checkbox"/> | <input type="checkbox"/> | <input type="checkbox"/> | <input type="checkbox"/>   |
| Chocolate cake .....               | <input type="checkbox"/> | <input type="checkbox"/> | <input type="checkbox"/> | <input type="checkbox"/> | <input type="checkbox"/> | <input type="checkbox"/>   |
| Other sweets .....                 | <input type="checkbox"/> | <input type="checkbox"/> | <input type="checkbox"/> | <input type="checkbox"/> | <input type="checkbox"/> | <input type="checkbox"/>   |

5.06 If you eat chocolate, how much do you usually eat each time?

Compared with the size of a Kvikk-Lunsj sjokolade (*a chocolate brand in the market*) and describe how much do you eat in relation to it.

|                          |                          |                          |                          |                          |                          |
|--------------------------|--------------------------|--------------------------|--------------------------|--------------------------|--------------------------|
| $\frac{1}{4}$            | $\frac{1}{2}$            | 1                        | $1 \frac{1}{2}$          | 2                        | More than 2              |
| <input type="checkbox"/> | <input type="checkbox"/> | <input type="checkbox"/> | <input type="checkbox"/> | <input type="checkbox"/> | <input type="checkbox"/> |

5.07 How often do you drink cocoa/hot chocolate?

|  | Never                    | 1-3 times<br>per month   | 1-3 times<br>per week    | 4-6 times<br>per week    | 1-2 times<br>per day     | 3 times per<br>day or more |
|--|--------------------------|--------------------------|--------------------------|--------------------------|--------------------------|----------------------------|
|  | <input type="checkbox"/> | <input type="checkbox"/> | <input type="checkbox"/> | <input type="checkbox"/> | <input type="checkbox"/> | <input type="checkbox"/>   |

## 6. ALCOHOL

6.01 How often have you in the last year:

|                                                                                           | Never                    | Less than monthly        | Monthly                  | Weekly                   | Daily or almost daily    |
|-------------------------------------------------------------------------------------------|--------------------------|--------------------------|--------------------------|--------------------------|--------------------------|
| Not been able to stop drinking alcohol when you have started? .....                       | <input type="checkbox"/> | <input type="checkbox"/> | <input type="checkbox"/> | <input type="checkbox"/> | <input type="checkbox"/> |
| Failed to do what was normally expected of you because of drinking? .....                 | <input type="checkbox"/> | <input type="checkbox"/> | <input type="checkbox"/> | <input type="checkbox"/> | <input type="checkbox"/> |
| Needed a drink in the morning to get yourself going after a heavy drinking session?       | <input type="checkbox"/> | <input type="checkbox"/> | <input type="checkbox"/> | <input type="checkbox"/> | <input type="checkbox"/> |
| Had feeling of guilt or remorse after drinking? .....                                     | <input type="checkbox"/> | <input type="checkbox"/> | <input type="checkbox"/> | <input type="checkbox"/> | <input type="checkbox"/> |
| Not been unable to remember what happened the night before because of your drinking?..... | <input type="checkbox"/> | <input type="checkbox"/> | <input type="checkbox"/> | <input type="checkbox"/> | <input type="checkbox"/> |

  

6.02 Have you or someone else been injured because of your drinking? .....

|                                                                                                                                        | Never                    | Yes, but not in the last year | Yes, during the last year |
|----------------------------------------------------------------------------------------------------------------------------------------|--------------------------|-------------------------------|---------------------------|
| Have you or someone else been injured because of your drinking? .....                                                                  | <input type="checkbox"/> | <input type="checkbox"/>      | <input type="checkbox"/>  |
| Has a relative, friend, physician, or other health care workers been concerned about your drinking or suggested you to cut down? ..... | <input type="checkbox"/> | <input type="checkbox"/>      | <input type="checkbox"/>  |

## 7. WEIGHT

7.01 Have you involuntary lost weight during the last 6 months?  
 Yes       No  
 If Yes: how many kilograms? .....

7.02 Estimate your body weight when you were 25 years old:  
 Number of kilograms .....

7.03 Are you satisfied with your present body weight?  
 Yes       No

7.04 What weight would you be satisfied with (your "ideal" weight)?  
 Number of kilograms .....

## 8. SOLVENTS

8.01 How many hours per week, do you do the following leisure- or professional activities:  
 Automobile repair/paint, ceramic work, painting/varnishing/solvents, hair dressing, glazier, electrician. (Put 0 if you do not engage in such leisure or professional activities)  
 Number of hours per week on average:

8.02 Do you use hair color preparations  
 Yes       No  
 If Yes: How many times per year?..

## 9. USE OF HEALTH SERVICES

9.01 Have you ever experienced that diseases have been insufficiently examined or treated, and this had a serious consequence?

- Yes, this has happened to me  
 Yes, this has happened to a close relative  
*(child, parents, spouse)*  
 No

If Yes, was it caused by?  
 (tick once or more):

- general practitioner  
 emergency medical doctor  
 private practising specialist  
 hospital doctor  
 other health personnel  
 alternative practitioner  
 more than one person due to deficient routines and interaction

9.02 Have you ever felt persuaded to accept an examination or treatment that you did not want?

- Yes  No

If Yes, do you think this has had unfortunate consequences for your health?

- Yes  No

9.03 Have you ever complained about a treatment you have received?

- Have never had a reason for complaining  
 Have considered complaining, but did not do  
 Have complained verbally  
 Have complained in writing

9.04 How long have you had your current general practitioner/other physician?

- Less than 6 months  
 6 to 12 months  
 12 to 24 months  
 More than 2 years

9.05 At the last visit to your GP, did you have a hard time to understand what the doctor(s) told you? Answer on a scale from 0 to 10, where 0 = they were difficult to understand and 10 = they were always easy to understand

- 0 1 2 3 4 5 6 7 8 9 10

9.06 How would you rate the treatment or counselling, you got at your last visit to your GP? Answer on a scale from 0 to 10, where 0 = worst treatment or counselling, and 10 = best treatment or counselling

- 0 1 2 3 4 5 6 7 8 9 10

9.07 During the last 12 months, how much of a problem, if any, was it to get a referral to special examinations (as x-ray, etc.) or to a specialist health care (private practising specialist or at hospital)?

- Not relevant  
 No problem  
 Some problem  
 Major problem

9.08 During the last 12 months, how much of a problem, if any, was it to get a referral to physiotherapist, chiropractor, etc.?

- Not relevant  
 No problem  
 Some problem  
 Major problem

9.09 Altogether, how much of a problem, if any, was it to get a referral to specialist health care?

- Not relevant  
 Very difficult  
 Some difficulties  
 Easy  
 Very easy

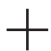

9.10 **During the last 12 months, have you been examined or treated by the specialist health care?**

Yes       No

If Yes, did you have a difficult time to understand what the doctor(s) told you? Answer on a scale from 0 to 10, where 0 = they were difficult to understand and 10 = they were always easy to understand

0 1 2 3 4 5 6 7 8 9 10

9.11 **How would you rate the treatment or counselling you got at your last visit to a specialist? Answer on a scale from 0 to 10, where 0 = worst treatment or counselling, and 10 = best treatment or counselling**

0 1 2 3 4 5 6 7 8 9 10

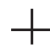

9.12 **Have you ever, previous to the year 2002, had an operation at a hospital or a specialist clinic?**

Yes       No

9.13 **Have you, during the last 12 months, used herbal or natural medicine?**

Yes       No

9.14 **Have you, during the last 12 months, used meditation, yoga, qi gong or thai chi as self-treatment?**

Yes       No

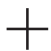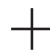

## 10. USE OF ANTIBIOTICS

10.01 Have you used antibiotics during the last 12 months? (all penicillin-like medicine in the form of tablets, syrups or injections)

Yes       No       Do not remember

If YES: What did you get the treatment for?

Have you taken many antibiotic treatments, tick for each treatment.

|                                                                                                 | Treatment<br>1           | Treatment<br>2           | Treatment<br>3           | Treatment<br>4           | Treatment<br>5           | Treatment<br>6           |
|-------------------------------------------------------------------------------------------------|--------------------------|--------------------------|--------------------------|--------------------------|--------------------------|--------------------------|
| • Urinary tract infection ( <i>bladder infection, cystitis</i> ) .....                          | <input type="checkbox"/> | <input type="checkbox"/> | <input type="checkbox"/> | <input type="checkbox"/> | <input type="checkbox"/> | <input type="checkbox"/> |
| • Respiratory tract infection ( <i>ear, sinus, throat or lung infection, bronchitis</i> ) ..... | <input type="checkbox"/> | <input type="checkbox"/> | <input type="checkbox"/> | <input type="checkbox"/> | <input type="checkbox"/> | <input type="checkbox"/> |
| • Other .....                                                                                   | <input type="checkbox"/> | <input type="checkbox"/> | <input type="checkbox"/> | <input type="checkbox"/> | <input type="checkbox"/> | <input type="checkbox"/> |
| Treatment duration: number of days .....                                                        | <input type="text"/>     | <input type="text"/>     | <input type="text"/>     | <input type="text"/>     | <input type="text"/>     | <input type="text"/>     |

How did you acquire the antibiotics for treatment?

Have you acquired many treatments, tick for each one.

|                                                      |                          |                          |                          |                          |                          |                          |
|------------------------------------------------------|--------------------------|--------------------------|--------------------------|--------------------------|--------------------------|--------------------------|
| With prescription from a physician/dentist .....     | <input type="checkbox"/> | <input type="checkbox"/> | <input type="checkbox"/> | <input type="checkbox"/> | <input type="checkbox"/> | <input type="checkbox"/> |
| Without contacting a physician/without prescription: |                          |                          |                          |                          |                          |                          |
| • Purchase from a pharmacy abroad .....              | <input type="checkbox"/> | <input type="checkbox"/> | <input type="checkbox"/> | <input type="checkbox"/> | <input type="checkbox"/> | <input type="checkbox"/> |
| • Purchase over the internet .....                   | <input type="checkbox"/> | <input type="checkbox"/> | <input type="checkbox"/> | <input type="checkbox"/> | <input type="checkbox"/> | <input type="checkbox"/> |
| • Remnants from earlier treatment at home .....      | <input type="checkbox"/> | <input type="checkbox"/> | <input type="checkbox"/> | <input type="checkbox"/> | <input type="checkbox"/> | <input type="checkbox"/> |
| • From family/friends .....                          | <input type="checkbox"/> | <input type="checkbox"/> | <input type="checkbox"/> | <input type="checkbox"/> | <input type="checkbox"/> | <input type="checkbox"/> |
| • Other ways .....                                   | <input type="checkbox"/> | <input type="checkbox"/> | <input type="checkbox"/> | <input type="checkbox"/> | <input type="checkbox"/> | <input type="checkbox"/> |

10.02 Do you presently have antibiotics at home?

Yes       No

If YES: is this after an agreement with your physician for treatment of chronic or frequently recurring disease?

Yes       No

If No: how did you acquire this antibiotic? (Multiple ticks are possible)

- Purchased from a pharmacy abroad ...
- Purchased over the internet .....
- Remnants from earlier treatment .....
- From family/friends .....
- Other ways .....

10.03 Would you consider using antibiotics without consulting your physician?

Yes       No

If YES: which conditions would you treat in such situation? (multiple ticks are possible)

- Common cold .....
- Cough .....
- Bronchitis .....
- Sore throat .....
- Sinusitis .....
- Fever .....
- Influenza .....
- Ear infection .....
- Diarrhoea .....
- Urinary tract infection .....
- Other infections .....

## 11. YOUR CIRCADIAN RHYTHM

We will ask you some questions about your sleeping habits

11.01 Have you worked in a shift work schedule during the last 3 months?

Yes  No

11.02 Number of days per week which you cannot freely choose when you sleep (e.g. work days)?

0 1 2 3 4 5 6 7

Then I go to bed at .....

I get ready to fall asleep at .....

Number of minutes I need to fall asleep .....

I wake up at .....

With help of:  Alarm clock  External stimulus (*noise, family members etc.*)  By myself

Number of minutes I need to get up .....

11.03 Number of days per week which you can freely choose when you sleep (e.g. free days or holidays)

0 1 2 3 4 5 6 7

Then I go to bed at .....

I get ready to fall asleep at .....

Number of minutes I need to fall asleep .....

I wake up at .....

With help of:  Alarm clock  External stimulus (*noise, family members etc.*)  By myself

Number of minutes I need to get up .....

## 12. SKIN AND DERMATOLOGY

12.01 How often do you usually take a shower or a bath? (tick once)

- 2 or more times daily
- 1 time daily
- 4-6 times per week
- 2-3 times per week
- Once a week
- Less than once a week

12.02 How often do you usually wash your hands with soap daily? (tick once)

- 0 times
- 1-5 times
- 6-10 times
- 11-20 times
- More than 20 times

12.03 Have you ever taken any antibiotics (penicillin and penicillin-like medicines) because of a skin disease, for example infected eczema, acne, non-healing leg ulcers, recurrent abscess?

- Yes       No

If Yes: How many times in average per year did you take antibiotics during the period you were most affected (tick once)

- 1-2       3-4       More than 4 times

12.04 Have you or have you ever had the following skin disorders? (tick once for each line)

- |                                                         |                          | Yes                      | No                       |
|---------------------------------------------------------|--------------------------|--------------------------|--------------------------|
| Psoriasis .....                                         | <input type="checkbox"/> | <input type="checkbox"/> | <input type="checkbox"/> |
| Atopic eczema (children's eczema)....                   | <input type="checkbox"/> | <input type="checkbox"/> | <input type="checkbox"/> |
| Recurrent hand eczema .....                             | <input type="checkbox"/> | <input type="checkbox"/> | <input type="checkbox"/> |
| Recurrent pimples/spots for several months .....        | <input type="checkbox"/> | <input type="checkbox"/> | <input type="checkbox"/> |
| Leg or foot ulcer that did not heal for 3-4 weeks ..... | <input type="checkbox"/> | <input type="checkbox"/> | <input type="checkbox"/> |

If YES on the question concerning leg and/or foot ulcer, do you have any leg ulcer today?

- Yes       No

12.05 Have you often or always any of the following complaints? (tick once for each line)

- |                                                                                                       |                          | Yes                      | No                       |
|-------------------------------------------------------------------------------------------------------|--------------------------|--------------------------|--------------------------|
| Swelling in the ankles or legs, particularly in the evenings .....                                    | <input type="checkbox"/> | <input type="checkbox"/> | <input type="checkbox"/> |
| Varicose veins .....                                                                                  | <input type="checkbox"/> | <input type="checkbox"/> | <input type="checkbox"/> |
| Eczema (red, itchy rash) on your legs .....                                                           | <input type="checkbox"/> | <input type="checkbox"/> | <input type="checkbox"/> |
| Leg pain that is getting worse when you are walking and is relieved when you are standing still ..... | <input type="checkbox"/> | <input type="checkbox"/> | <input type="checkbox"/> |

12.06 Have you ever had the following diagnoses by a physician? (tick once for each line)

- |                     |                          | Yes                      | No                       |
|---------------------|--------------------------|--------------------------|--------------------------|
| Psoriasis .....     | <input type="checkbox"/> | <input type="checkbox"/> | <input type="checkbox"/> |
| Atopic eczema ..... | <input type="checkbox"/> | <input type="checkbox"/> | <input type="checkbox"/> |
| Rosacea .....       | <input type="checkbox"/> | <input type="checkbox"/> | <input type="checkbox"/> |

12.07 Have you recurring large acne/abscesses that are tender/painful and often form scars in the following places? (tick once for each line)

- |                                |                          | Yes                      | No                       |
|--------------------------------|--------------------------|--------------------------|--------------------------|
| Armpits .....                  | <input type="checkbox"/> | <input type="checkbox"/> | <input type="checkbox"/> |
| Under the breasts .....        | <input type="checkbox"/> | <input type="checkbox"/> | <input type="checkbox"/> |
| Stomach groove/the navel ..... | <input type="checkbox"/> | <input type="checkbox"/> | <input type="checkbox"/> |
| Around the genitalia .....     | <input type="checkbox"/> | <input type="checkbox"/> | <input type="checkbox"/> |
| Around the anus .....          | <input type="checkbox"/> | <input type="checkbox"/> | <input type="checkbox"/> |
| The groin .....                | <input type="checkbox"/> | <input type="checkbox"/> | <input type="checkbox"/> |

If Yes: Have you ever visited a physician because of abscesses?

- Yes       No

If Yes, did you get any of the following treatments? (tick once for each line)

- |                                                             |                          | Yes                      | No                       |
|-------------------------------------------------------------|--------------------------|--------------------------|--------------------------|
| Antibiotic ointment .....                                   | <input type="checkbox"/> | <input type="checkbox"/> | <input type="checkbox"/> |
| Antibiotic tablets .....                                    | <input type="checkbox"/> | <input type="checkbox"/> | <input type="checkbox"/> |
| Surgical drainage .....                                     | <input type="checkbox"/> | <input type="checkbox"/> | <input type="checkbox"/> |
| A larger surgical intervention including skin removal ..... | <input type="checkbox"/> | <input type="checkbox"/> | <input type="checkbox"/> |
| Surgical laser treatment .....                              | <input type="checkbox"/> | <input type="checkbox"/> | <input type="checkbox"/> |





# Follow-up questions

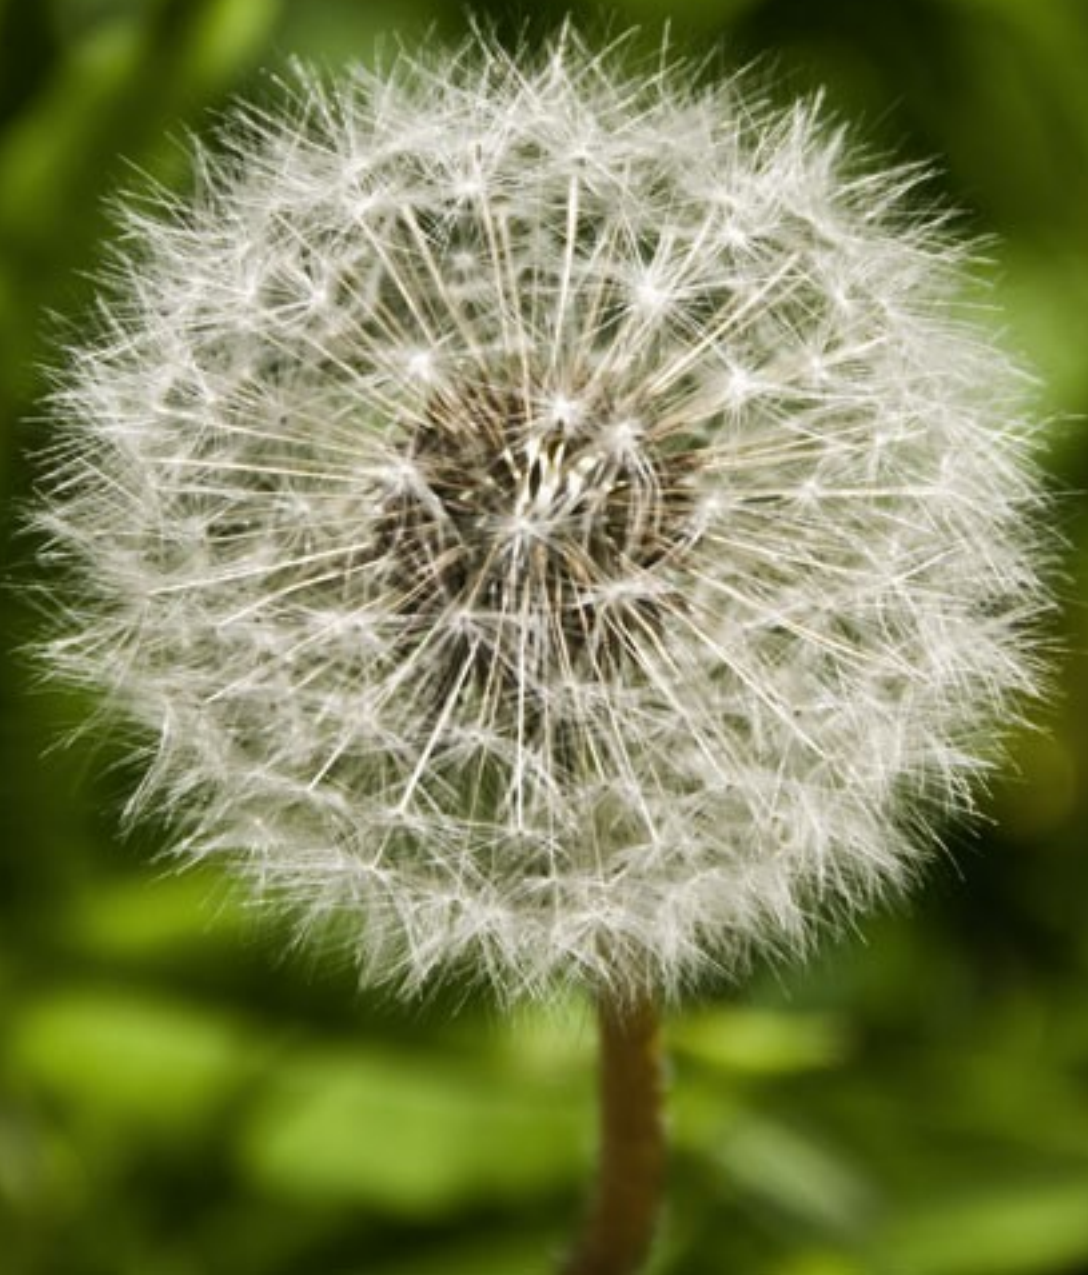

## INFORMATION TO FOLLOW-UP QUESTIONS

The following pages with questions should not be answered by everybody. If you have answered yes to one or more of questions below, we ask you to move on to the follow-up questions on the topic or topics you have answered yes to. The first four topics are from the first questionnaire and the last question is from this form.

We have for the sake of simplicity highlighted topics with different colours so that you will find the questions that applies to you.

---

If you answered YES to that you have: long-term or recurrent pain that has lasted for 3 months or more, please answer the questions on page 19 and 20. The margin is marked with green.

---

---

If you answered YES to that you have undergone any surgery during the last 3 years, please answer the questions on page 21 and 22. The margin is marked with purple.

---

---

If you answered YES to that you're working outdoors at least 25% of the time, or in facilities with low temperature, such as warehouse/industrial halls, please answer the questions on page 23. The margin is marked with red.

---

---

If you answered YES to that you have used non-prescription pain relievers, please answer questions on page 24. The margin is marked with orange.

---

---

If you answered YES to that you have or have ever had skin problems (such as psoriasis, atopic eczema, non-healing leg or foot ulcers, recurrent hand eczema, acne or abscesses), please answer the questions on page 25. The margin is marked with yellow.

---

If you have answered **NO** to these five questions, you are finished with your answers. The questionnaire is to be returned in the reply envelope you were given at the survey site. The postage is already paid.

Should you wish to give us written feedback on either the questionnaire or The Tromsø Study in general, you are welcome to that on page 26.

Do you have any questions, please contact us by phone or by e-mail. You can find the contact information on the back of the form. **THANK YOU** for taking the time to the survey and to answer our questions.

## 13. FOLLOW-UP QUESTIONS ON PAIN

You answered in the first questionnaire that you have protracted or constantly recurrent pain that has lasted for 3 months or more. Here, we ask you to describe the pain a little closer.

13.01 **How long have you had this pain?**

Number of years   months

13.02 **How often do you have this pain?**

- Every day  Once a month or more  
 Once a week or more  Less than once a month

13.03 **Where does it hurt?** (Tick for all locations where you have protracted or constantly recurrent pain)

- |                                                       |                                                         |
|-------------------------------------------------------|---------------------------------------------------------|
| <input type="checkbox"/> Head/face                    | <input type="checkbox"/> Thigh/knee/leg                 |
| <input type="checkbox"/> Jaw/temporo-mandibular joint | <input type="checkbox"/> Ankle/foot                     |
| <input type="checkbox"/> Neck                         | <input type="checkbox"/> Chest/breast                   |
| <input type="checkbox"/> Back                         | <input type="checkbox"/> Stomach                        |
| <input type="checkbox"/> Shoulder                     | <input type="checkbox"/> Genitalia /reproductive organs |
| <input type="checkbox"/> Arm/elbow                    | <input type="checkbox"/> Skin                           |
| <input type="checkbox"/> Hand                         | <input type="checkbox"/> Other location                 |
| <input type="checkbox"/> Hip                          |                                                         |

13.04 **What do you believe is the cause of the pain?** (Tick for all known causes)

- |                                                                      |                                                                  |
|----------------------------------------------------------------------|------------------------------------------------------------------|
| <input type="checkbox"/> Accident /acute injury                      | <input type="checkbox"/> Fibromyalgia                            |
| <input type="checkbox"/> Long-term stress                            | <input type="checkbox"/> Angina pectoris                         |
| <input type="checkbox"/> Surgical intervention/operation             | <input type="checkbox"/> Poor blood circulation                  |
| <input type="checkbox"/> Herniated disk ( <i>prolapse</i> ) /lumbago | <input type="checkbox"/> Cancer                                  |
| <input type="checkbox"/> Whiplash                                    | <input type="checkbox"/> Nerve damage/neuropathy                 |
| <input type="checkbox"/> Migraine/headache                           | <input type="checkbox"/> Infection                               |
| <input type="checkbox"/> Osteoarthritis                              | <input type="checkbox"/> Herpes zoster                           |
| <input type="checkbox"/> Rheumatoid arthritis                        | <input type="checkbox"/> Another cause ( <i>describe below</i> ) |
| <input type="checkbox"/> Bechterews syndrome                         | <input type="checkbox"/> Don't know                              |

Describe the other cause:

.....

13.05 **Which kind of treatment have you received for the pain?** (Tick for all types of pain treatments you have received)

- |                                                               |                                                                                                                    |
|---------------------------------------------------------------|--------------------------------------------------------------------------------------------------------------------|
| <input type="checkbox"/> No treatment                         | <input type="checkbox"/> Psycho-educative/relaxation training/ psychotherapy                                       |
| <input type="checkbox"/> Analgesic medications/painkillers    | <input type="checkbox"/> Acupuncture                                                                               |
| <input type="checkbox"/> Physiotherapy/chiropractic treatment | <input type="checkbox"/> Complimentary and alternative medicine ( <i>homeopathy, healing, aromatherapy, etc.</i> ) |
| <input type="checkbox"/> Treatment at a pain clinic           | <input type="checkbox"/> Other treatment                                                                           |
| <input type="checkbox"/> Surgery                              |                                                                                                                    |

13.06 On a scale of 0 to 10, where 0 corresponds to no pain and 10 corresponds to the worst possible pain you can imagine:

How strong would you say that the pain usually is? .....  
No pain 0 1 2 3 4 5 6 7 8 9 10 Worst imaginable pain

How strong is the pain when it is in its strongest Intense? .....  
No pain 0 1 2 3 4 5 6 7 8 9 10 Worst imaginable pain

To what degree does the pain interfere with your sleep? .....  
No effect 0 1 2 3 4 5 6 7 8 9 10 Impossible to sleep

To what degree does the pain interfere with performing common activities at home and at work? .....  
No effect 0 1 2 3 4 5 6 7 8 9 10 Can not do anything

## 14. FOLLOW-UP QUESTIONS ON SURGERY

In the first questionnaire you answered that you have undergone an operation during the last 3 years.

14.01 **How many times have you undergone surgery during the last 3 years?**

Number .....

Below, please describe the operation. If you have undergone several operations during the last 3 years, these questions concern the last surgery you underwent.

14.02 **Where in your body did you have surgery?**  
(If you were operated simultaneously in several places in the body, tick more than once)

Surgery in the head/neck/back

- Head/face .....
- Neck/throat .....
- Back .....

Surgery in the chest

- Heart .....
- Lungs .....
- Breasts .....
- Another surgery in the chest region .....

Surgery in the stomach/pelvis

- Stomach/intestines .....
- Inguinal hernia .....
- Urinary tract/reproductive organs .....
- Gall bladder/biliary tract .....
- Another surgery in the stomach/pelvis .....

Surgery in the hip/legs

- Hip/thigh .....
- Knee/leg .....
- Ankle/foot .....
- Amputation .....

Surgery in the shoulder and arm

- Shoulder/overarm .....
- Elbow/underarm .....
- Hand .....
- Amputation .....

14.03 **Reason for the surgery:**

- Acute illness/trauma .....
- Planned non-cosmetic operation .....
- Planned cosmetic operation .....

14.04 **Where did you have the surgery?**

- The hospital in Tromsø .....
- The hospital in Harstad .....
- Other public hospital .....
- Private clinic .....

14.05 **How long time is it since you had surgery?**

Number of years .....  Months .....

14.06 **Do you have reduced sensitivity in an area near the surgical scar?**

- Yes       No

14.07 **Are you hypersensitive to touch, heat or cold in an area near the surgical scar?**

- Yes       No

14.08 **Does slight touch from clothes, showering or similar cause discomfort/pain?**

- Yes       No

14.09 **If you had pain at the site of surgery before you had surgery, do you have the same type of pain now?**

- Yes       No

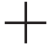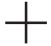

14.10

**The pain at the site of surgery:** Answer on a scale from 0 to 10, where 0=no pain and 10=worst pain you can imagine

How strong pain did you have at the site of surgery before you had surgery

No pain

|                          |                          |                          |                          |                          |                          |                          |                          |                          |                          |                          |
|--------------------------|--------------------------|--------------------------|--------------------------|--------------------------|--------------------------|--------------------------|--------------------------|--------------------------|--------------------------|--------------------------|
| 0                        | 1                        | 2                        | 3                        | 4                        | 5                        | 6                        | 7                        | 8                        | 9                        | 10                       |
| <input type="checkbox"/> | <input type="checkbox"/> | <input type="checkbox"/> | <input type="checkbox"/> | <input type="checkbox"/> | <input type="checkbox"/> | <input type="checkbox"/> | <input type="checkbox"/> | <input type="checkbox"/> | <input type="checkbox"/> | <input type="checkbox"/> |

Worst imaginable pain

How strong pain do you normally have at the site of surgery now .....

No pain

|                          |                          |                          |                          |                          |                          |                          |                          |                          |                          |                          |
|--------------------------|--------------------------|--------------------------|--------------------------|--------------------------|--------------------------|--------------------------|--------------------------|--------------------------|--------------------------|--------------------------|
| 0                        | 1                        | 2                        | 3                        | 4                        | 5                        | 6                        | 7                        | 8                        | 9                        | 10                       |
| <input type="checkbox"/> | <input type="checkbox"/> | <input type="checkbox"/> | <input type="checkbox"/> | <input type="checkbox"/> | <input type="checkbox"/> | <input type="checkbox"/> | <input type="checkbox"/> | <input type="checkbox"/> | <input type="checkbox"/> | <input type="checkbox"/> |

Worst imaginable pain

How strong pain do you normally have at the site of surgery when it is most intense .....

No pain

|                          |                          |                          |                          |                          |                          |                          |                          |                          |                          |                          |
|--------------------------|--------------------------|--------------------------|--------------------------|--------------------------|--------------------------|--------------------------|--------------------------|--------------------------|--------------------------|--------------------------|
| 0                        | 1                        | 2                        | 3                        | 4                        | 5                        | 6                        | 7                        | 8                        | 9                        | 10                       |
| <input type="checkbox"/> | <input type="checkbox"/> | <input type="checkbox"/> | <input type="checkbox"/> | <input type="checkbox"/> | <input type="checkbox"/> | <input type="checkbox"/> | <input type="checkbox"/> | <input type="checkbox"/> | <input type="checkbox"/> | <input type="checkbox"/> |

Worst imaginable pain

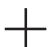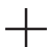

## 15. FOLLOW-UP QUESTIONS ABOUT WORK IN COLD ENVIRONMENT

In the first questionnaire you answered yes to that you work in cold environments. Here are some follow-up questions that we hope you will answer.

15.01 Do you feel cold at work?

- Yes, often
- Yes, sometimes
- No, never

15.05 Have you had itching and/or rash in relation to cold exposure?

- Yes       No

15.02 For how long have you been exposed to cold air below 0°C during the last winter?

Leisure/hobbies (hours/week) .....

Work (hours/week) .....

Outdoors, with suitable clothing (hours/week) .....

Outdoors, without suitable clothing (hours/week) .....

Indoors, with no heating (hours/week) .....

In cold, with wet clothing (hours/week) .....

Contact with cold objects/tools (hours/week) .....

15.06 Have you during the last 12 months had an accident where cold has been involved, and which required medical treatment?

|                       | Yes                      | No                       |
|-----------------------|--------------------------|--------------------------|
| At work .....         | <input type="checkbox"/> | <input type="checkbox"/> |
| In leisure time ..... | <input type="checkbox"/> | <input type="checkbox"/> |

15.07 Do you experience any of the following symptoms while you are in a cold environment? If so, at what temperature do the symptoms occur?

|                                                       | Yes                      | No                       | Under °C                                  |
|-------------------------------------------------------|--------------------------|--------------------------|-------------------------------------------|
| Breathing problems .....                              | <input type="checkbox"/> | <input type="checkbox"/> | <input style="width: 40px;" type="text"/> |
| Wheezy breathing .....                                | <input type="checkbox"/> | <input type="checkbox"/> | <input style="width: 40px;" type="text"/> |
| Mucus secretion from lungs .....                      | <input type="checkbox"/> | <input type="checkbox"/> | <input style="width: 40px;" type="text"/> |
| Chest pain .....                                      | <input type="checkbox"/> | <input type="checkbox"/> | <input style="width: 40px;" type="text"/> |
| Disturbance in heart rhythm .....                     | <input type="checkbox"/> | <input type="checkbox"/> | <input style="width: 40px;" type="text"/> |
| Impaired blood circulation in hands/feet .....        | <input type="checkbox"/> | <input type="checkbox"/> | <input style="width: 40px;" type="text"/> |
| Visual disturbance (short term/transient) .....       | <input type="checkbox"/> | <input type="checkbox"/> | <input style="width: 40px;" type="text"/> |
| Migraine (short term/transient) .....                 | <input type="checkbox"/> | <input type="checkbox"/> | <input style="width: 40px;" type="text"/> |
| Fingers turning white (short term/transient) .....    | <input type="checkbox"/> | <input type="checkbox"/> | <input style="width: 40px;" type="text"/> |
| Fingers turning blue-red (short term/transient) ..... | <input type="checkbox"/> | <input type="checkbox"/> | <input style="width: 40px;" type="text"/> |

15.03 What ambient temperature prevents you from:

|                                            | Under °C                                  |
|--------------------------------------------|-------------------------------------------|
| Working outdoors .....                     | <input style="width: 40px;" type="text"/> |
| Training outdoors .....                    | <input style="width: 40px;" type="text"/> |
| Performing other activities outdoors ..... | <input style="width: 40px;" type="text"/> |

15.04 Have you during the last 12 months had a frostbite with blisters, sores or skin injury?

- Yes       No

If Yes, how many times?.....

15.08 How does cold environments and cold-related symptoms influence your performance?

|                                                | Decrease                 | No effect                | Improve                  |
|------------------------------------------------|--------------------------|--------------------------|--------------------------|
| Concentration .....                            | <input type="checkbox"/> | <input type="checkbox"/> | <input type="checkbox"/> |
| Memory .....                                   | <input type="checkbox"/> | <input type="checkbox"/> | <input type="checkbox"/> |
| Finger sensitivity (feeling) .....             | <input type="checkbox"/> | <input type="checkbox"/> | <input type="checkbox"/> |
| Finger dexterity (motor) .....                 | <input type="checkbox"/> | <input type="checkbox"/> | <input type="checkbox"/> |
| Control of movement (for example tremor) ..... | <input type="checkbox"/> | <input type="checkbox"/> | <input type="checkbox"/> |
| Heavy physical work .....                      | <input type="checkbox"/> | <input type="checkbox"/> | <input type="checkbox"/> |
| Long-lasting physical work .....               | <input type="checkbox"/> | <input type="checkbox"/> | <input type="checkbox"/> |

## 16. USE OF NON-PRESCRIPTION PAINKILLERS

In the first questionnaire you answered that you had used non-prescription painkillers (analgesics) in the last 4 weeks. Here are some follow-up questions we hope you will answer.

**16.01 What types of non-prescription painkillers have you used?**

**Paracetamol:** (*Pamol, Panodil, Paracet, Paracetamol, Pinex*)

- Not used
- Less than every week
- Every week, but not daily
- daily

How much do you usually take daily when you use these medicines? (number of tablets, suppositories) .....

**Acetylsalicylates:** (*Aspirin, Dispril, Globoid*)

- Not used
- Less than every week
- Every week, but not daily
- Daily

How much do you usually take daily when you use these medicines? (number of tablets) .....

**Ibuprofen:** (*Ibuprofen, Ibuprofen, Ibuprofen, Ibuprofen*)

- Not used
- Less than every week
- Every week, but not daily
- Daily

How much do you usually take daily when you use these medicines? (number of tablets, suppositories) .....

**Naproxen:** (*Ledox, Naproxen*)

- Not used
- Less than every week
- Every week, but not daily
- Daily

How much do you usually take daily when you use these medicines? (number of tablets) .....

**Phenazone with caffeine:** (*Antineuralgica, Fanalgin, Fenazon-koffein, Fenazon-koffein sterke*)

- Not used
- Less than every week
- Every week, but not daily
- daily

How much do you usually take daily when you use these medicines? (number of tablets) .....

**16.02 For which complaints do you use non-prescription painkillers? (multiple ticks are possible)**

- Headache
- Menstrual discomfort
- Migraine
- Back pain
- Muscle/joint pain
- Tooth pain
- Other

**16.03 Do you think you have experienced side effects of some of the medicines? (tick once for each line)**

|                               | Yes                      | No                       |
|-------------------------------|--------------------------|--------------------------|
| Paracetamol .....             | <input type="checkbox"/> | <input type="checkbox"/> |
| Acetylsalicylates .....       | <input type="checkbox"/> | <input type="checkbox"/> |
| Ibuprofen .....               | <input type="checkbox"/> | <input type="checkbox"/> |
| Naproxen .....                | <input type="checkbox"/> | <input type="checkbox"/> |
| Phenazone with caffeine ..... | <input type="checkbox"/> | <input type="checkbox"/> |

**16.04 Where do you usually purchase painkillers?**

- Pharmacy
- Grocery
- Petrol stations
- Abroad
- Internet

**16.05 Do you combine the treatment with the use of painkillers on prescription?**

- Yes       No



## 17. FOLLOW-UP QUESTIONS ABOUT SKIN DISEASES

On page 15 in this questionnaire you answered that you have or have had a skin disease. Here are some follow-up questions we hope you will answer.

Answer on a scale from 0 to 10, where 0 corresponds to no symptoms and 10 correspond to worst imaginable complaints. If you answered YES to that you have or have had:

|                                                                                                                          |                                                                           | No<br>complaint                              | 0                        | 1                        | 2                        | 3                        | 4                        | 5                        | 6                        | 7                        | 8                        | 9                        | 10                       | Worst<br>imaginable<br>complaints |
|--------------------------------------------------------------------------------------------------------------------------|---------------------------------------------------------------------------|----------------------------------------------|--------------------------|--------------------------|--------------------------|--------------------------|--------------------------|--------------------------|--------------------------|--------------------------|--------------------------|--------------------------|--------------------------|-----------------------------------|
| <b>17.01 Psoriasis</b>                                                                                                   | · How much are you affected by your psoriasis today? .....                |                                              | <input type="checkbox"/> | <input type="checkbox"/> | <input type="checkbox"/> | <input type="checkbox"/> | <input type="checkbox"/> | <input type="checkbox"/> | <input type="checkbox"/> | <input type="checkbox"/> | <input type="checkbox"/> | <input type="checkbox"/> | <input type="checkbox"/> |                                   |
|                                                                                                                          | · How much are you affected by your psoriasis when it is most severe?     |                                              | <input type="checkbox"/> | <input type="checkbox"/> | <input type="checkbox"/> | <input type="checkbox"/> | <input type="checkbox"/> | <input type="checkbox"/> | <input type="checkbox"/> | <input type="checkbox"/> | <input type="checkbox"/> | <input type="checkbox"/> | <input type="checkbox"/> |                                   |
| <b>17.02 Atopic eczema</b>                                                                                               | · How much are you affected by your atopic eczema today? .....            |                                              | <input type="checkbox"/> | <input type="checkbox"/> | <input type="checkbox"/> | <input type="checkbox"/> | <input type="checkbox"/> | <input type="checkbox"/> | <input type="checkbox"/> | <input type="checkbox"/> | <input type="checkbox"/> | <input type="checkbox"/> | <input type="checkbox"/> |                                   |
|                                                                                                                          | · How much are you affected by your atopic eczema when it is most severe? |                                              | <input type="checkbox"/> | <input type="checkbox"/> | <input type="checkbox"/> | <input type="checkbox"/> | <input type="checkbox"/> | <input type="checkbox"/> | <input type="checkbox"/> | <input type="checkbox"/> | <input type="checkbox"/> | <input type="checkbox"/> | <input type="checkbox"/> |                                   |
| <b>17.03 Hand eczema</b>                                                                                                 | · How much are you affected by your hand eczema today? .....              |                                              | <input type="checkbox"/> | <input type="checkbox"/> | <input type="checkbox"/> | <input type="checkbox"/> | <input type="checkbox"/> | <input type="checkbox"/> | <input type="checkbox"/> | <input type="checkbox"/> | <input type="checkbox"/> | <input type="checkbox"/> | <input type="checkbox"/> |                                   |
|                                                                                                                          | · How much are you affected by your hand eczema when it is most severe?   |                                              | <input type="checkbox"/> | <input type="checkbox"/> | <input type="checkbox"/> | <input type="checkbox"/> | <input type="checkbox"/> | <input type="checkbox"/> | <input type="checkbox"/> | <input type="checkbox"/> | <input type="checkbox"/> | <input type="checkbox"/> | <input type="checkbox"/> |                                   |
| <b>17.04 Acne</b>                                                                                                        | · How much are you affected by your acne today? .....                     |                                              | <input type="checkbox"/> | <input type="checkbox"/> | <input type="checkbox"/> | <input type="checkbox"/> | <input type="checkbox"/> | <input type="checkbox"/> | <input type="checkbox"/> | <input type="checkbox"/> | <input type="checkbox"/> | <input type="checkbox"/> | <input type="checkbox"/> |                                   |
|                                                                                                                          | · How much are you affected by your acne when it is most severe? ....     |                                              | <input type="checkbox"/> | <input type="checkbox"/> | <input type="checkbox"/> | <input type="checkbox"/> | <input type="checkbox"/> | <input type="checkbox"/> | <input type="checkbox"/> | <input type="checkbox"/> | <input type="checkbox"/> | <input type="checkbox"/> | <input type="checkbox"/> |                                   |
| <b>17.05 Abscesses</b>                                                                                                   | · How much are you affected by your abscesses today? .....                |                                              | <input type="checkbox"/> | <input type="checkbox"/> | <input type="checkbox"/> | <input type="checkbox"/> | <input type="checkbox"/> | <input type="checkbox"/> | <input type="checkbox"/> | <input type="checkbox"/> | <input type="checkbox"/> | <input type="checkbox"/> | <input type="checkbox"/> |                                   |
|                                                                                                                          | · How much are you affected by your abscesses when it is most severe? ..  |                                              | <input type="checkbox"/> | <input type="checkbox"/> | <input type="checkbox"/> | <input type="checkbox"/> | <input type="checkbox"/> | <input type="checkbox"/> | <input type="checkbox"/> | <input type="checkbox"/> | <input type="checkbox"/> | <input type="checkbox"/> | <input type="checkbox"/> |                                   |
| <b>17.06 Here is a list of factors that might trigger or exacerbate abscesses, tick for what you think apply to you:</b> |                                                                           | Yes                                          | No                       |                          |                          |                          |                          |                          |                          |                          |                          |                          |                          |                                   |
|                                                                                                                          | Stress/psychological strain .....                                         | <input type="checkbox"/>                     | <input type="checkbox"/> |                          |                          |                          |                          |                          |                          |                          |                          |                          |                          |                                   |
|                                                                                                                          | Narrow/tight clothing .....                                               | <input type="checkbox"/>                     | <input type="checkbox"/> |                          |                          |                          |                          |                          |                          |                          |                          |                          |                          |                                   |
|                                                                                                                          | Menstrual periods .....                                                   | <input type="checkbox"/>                     | <input type="checkbox"/> |                          |                          |                          |                          |                          |                          |                          |                          |                          |                          |                                   |
|                                                                                                                          | Pregnancy .....                                                           | <input type="checkbox"/>                     | <input type="checkbox"/> |                          |                          |                          |                          |                          |                          |                          |                          |                          |                          |                                   |
|                                                                                                                          | Other .....                                                               | <input type="checkbox"/>                     | <input type="checkbox"/> |                          |                          |                          |                          |                          |                          |                          |                          |                          |                          |                                   |
| <b>17.07 How many episodes of abscesses do you usually have per year? (tick once)</b>                                    |                                                                           |                                              |                          |                          |                          |                          |                          |                          |                          |                          |                          |                          |                          |                                   |
|                                                                                                                          | <input type="checkbox"/> 0-1                                              | <input type="checkbox"/> 4-6                 |                          |                          |                          |                          |                          |                          |                          |                          |                          |                          |                          |                                   |
|                                                                                                                          | <input type="checkbox"/> 2-3                                              | <input type="checkbox"/> More than 6         |                          |                          |                          |                          |                          |                          |                          |                          |                          |                          |                          |                                   |
|                                                                                                                          |                                                                           | 25                                           |                          |                          |                          |                          |                          |                          |                          |                          |                          |                          |                          |                                   |
| <b>17.08 How old were you when you got abscesses for the first time?</b>                                                 | <input type="checkbox"/> 0-12 years                                       | <input type="checkbox"/> 26-35 years         |                          |                          |                          |                          |                          |                          |                          |                          |                          |                          |                          |                                   |
|                                                                                                                          | <input type="checkbox"/> 13-19 years                                      | <input type="checkbox"/> 36-50 years         |                          |                          |                          |                          |                          |                          |                          |                          |                          |                          |                          |                                   |
|                                                                                                                          | <input type="checkbox"/> 20-25 years                                      | <input type="checkbox"/> Older than 50 years |                          |                          |                          |                          |                          |                          |                          |                          |                          |                          |                          |                                   |
| <b>17.09 If you no longer have abscesses, how old were you when it disappeared?</b>                                      | <input type="checkbox"/> 0-12 years                                       | <input type="checkbox"/> 26-35 years         |                          |                          |                          |                          |                          |                          |                          |                          |                          |                          |                          |                                   |
|                                                                                                                          | <input type="checkbox"/> 13-19 years                                      | <input type="checkbox"/> 36-50 years         |                          |                          |                          |                          |                          |                          |                          |                          |                          |                          |                          |                                   |
|                                                                                                                          | <input type="checkbox"/> 20-25 years                                      | <input type="checkbox"/> Older than 50 years |                          |                          |                          |                          |                          |                          |                          |                          |                          |                          |                          |                                   |



**Thank you for your help**

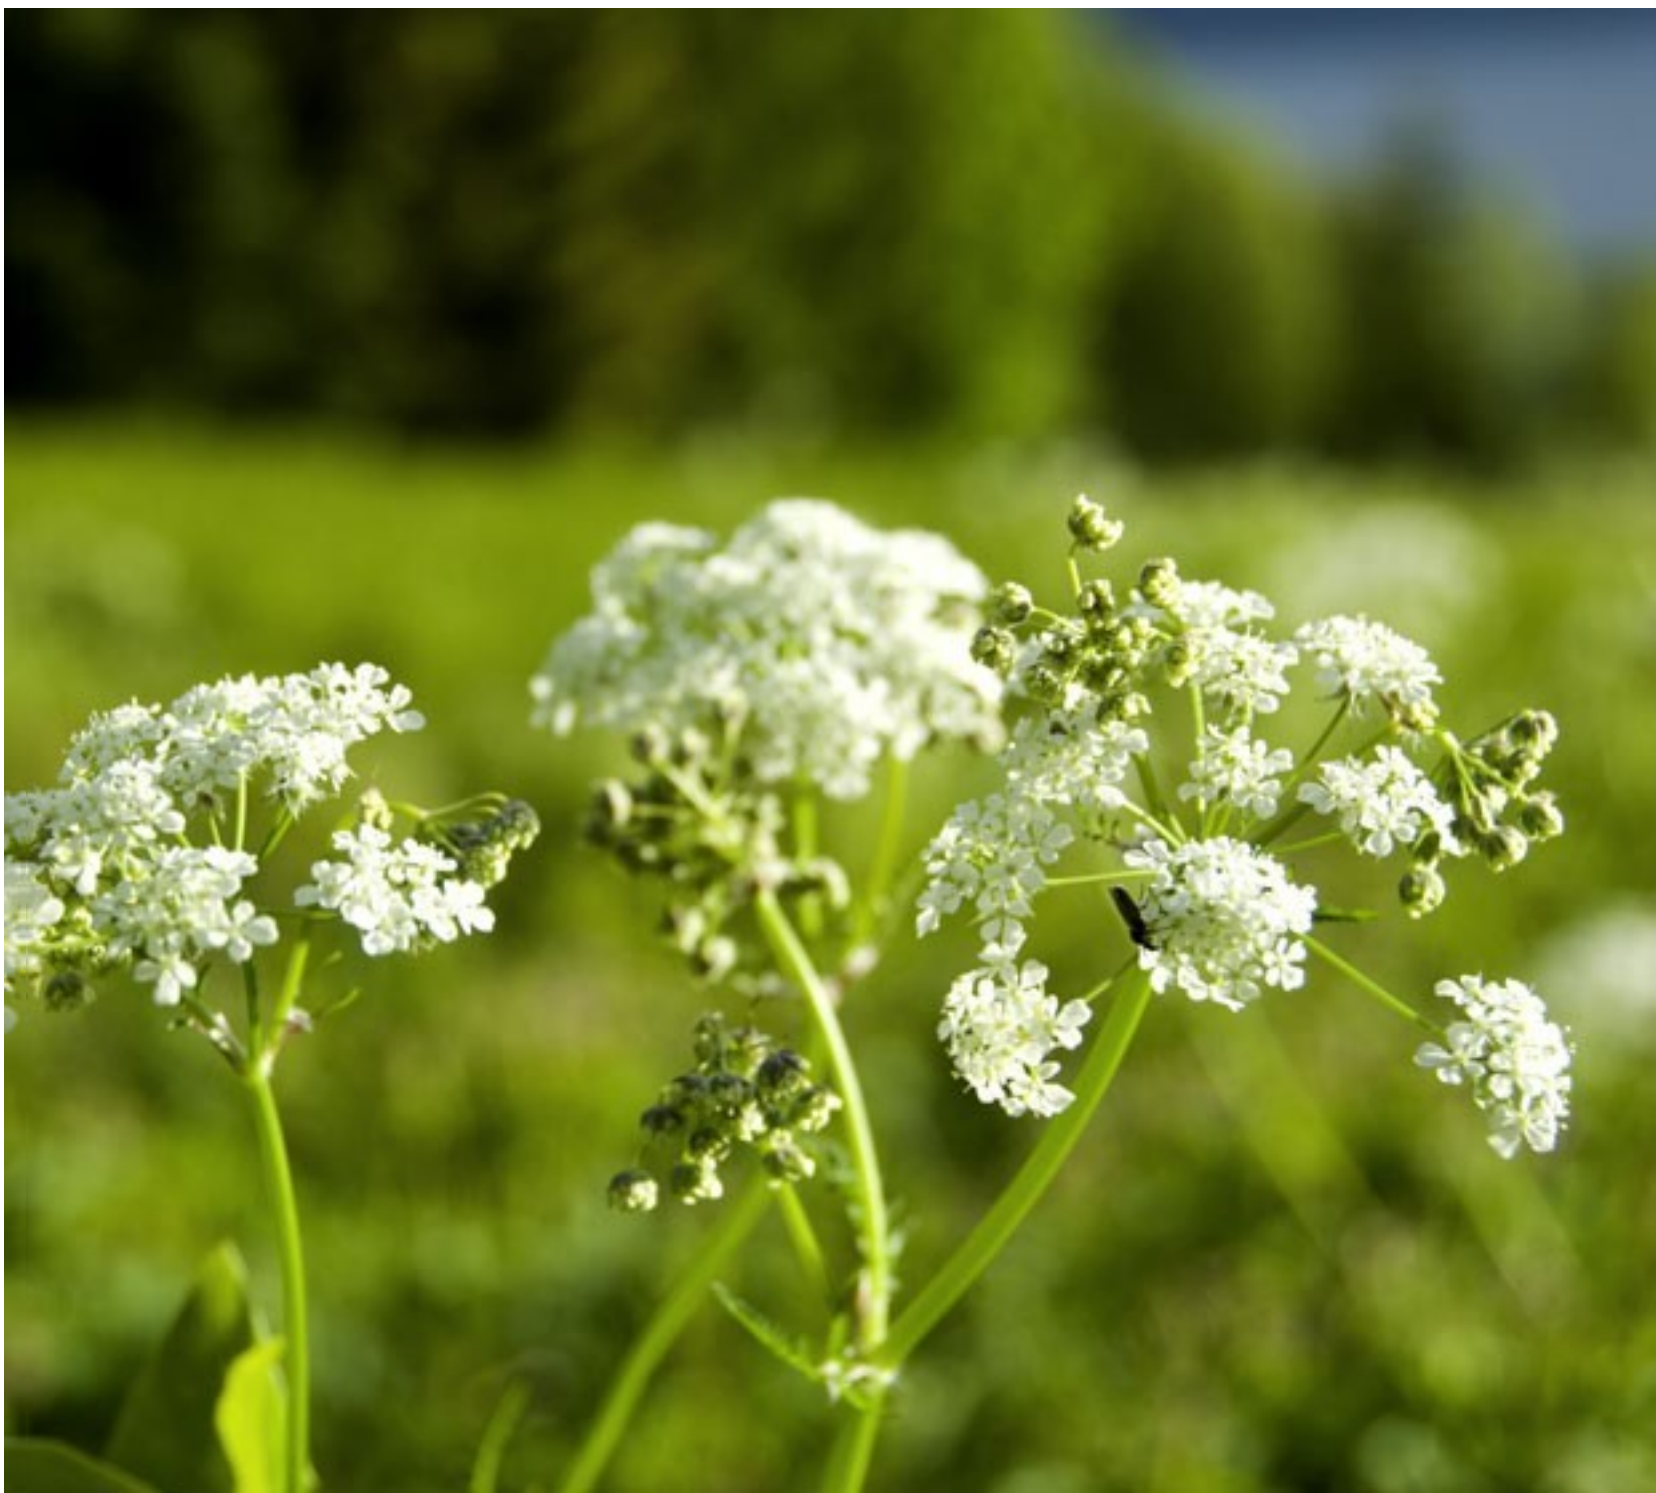

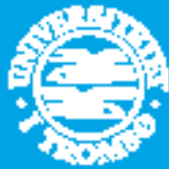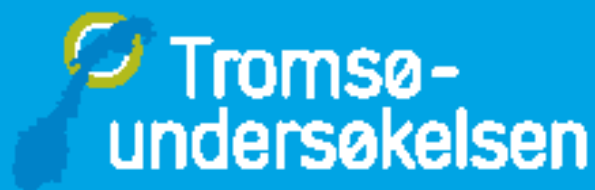

The Tromsø Study

Department of community medicine, University of Tromsø

9037 TROMSØ

Telephone: 77 64 48 16

Telefax: 77 64 48 31

Email: [tromsous@ism.uit.no](mailto:tromsous@ism.uit.no)

[www.tromso6.no](http://www.tromso6.no)
